# Supplementary material
Source: PubMed Central journal article supplement (PMC4176392)

## SUPPORTING INFORMATION

### An Iridoid Glucoside and the Related Aglycones from *Cornus florida*

Yangqing He, Jiangnan Peng, Mark. T. Hamann, and Lyndon M. West\*

#### Table of Contents:

Pages S2–S4: Extraction and Purification Procedures.

Page S5:  $^1\text{H}$  NMR Spectrum of Cornusoside A (**1**) (DMSO- $d_6$ , 400 MHz)

Page S6:  $^{13}\text{C}$  NMR Spectrum of Cornusoside A (**1**) (DMSO- $d_6$ , 100 MHz)

Page S7:  $^1\text{H}$ – $^1\text{H}$  COSY Spectrum of Cornusoside A (**1**) (DMSO- $d_6$ , 400 MHz)

Page S8: HSQC Spectrum of Cornusoside A (**1**) (DMSO- $d_6$ , 400 MHz)

Page S9: HMBC Spectrum of Cornusoside A (**1**) (DMSO- $d_6$ , 400 MHz)

Page S10: NOESY Spectrum of Cornusoside A (**1**) (DMSO- $d_6$ , 400 MHz)

Page S11:  $^1\text{H}$  NMR Spectrum of Cornolactone A (**2**) ( $\text{CDCl}_3$ , 400 MHz)

Page S12:  $^{13}\text{C}$  NMR Spectrum of Cornolactone A (**2**) ( $\text{CDCl}_3$ , 100 MHz)

Page S13:  $^1\text{H}$ – $^1\text{H}$  COSY Spectrum of Cornolactone A (**2**) ( $\text{CDCl}_3$ , 400 MHz)

Page S14: HSQC Spectrum of Cornolactone A (**2**) ( $\text{CDCl}_3$ , 400 MHz)

Page S15: HMBC Spectrum of Cornolactone A (**2**) ( $\text{CDCl}_3$ , 400 MHz)

Page S16: NOESY Spectrum of Cornolactone A (**2**) ( $\text{CDCl}_3$ , 400 MHz)

Page S17:  $^1\text{H}$  NMR Spectrum of Cornolactone B (**3**) ( $\text{CDCl}_3$ , 400 MHz)

Page S18:  $^{13}\text{C}$  NMR Spectrum of Cornolactone B (**3**) ( $\text{CDCl}_3$ , 100 MHz)

Page S19:  $^1\text{H}$ – $^1\text{H}$  COSY Spectrum of Cornolactone B (**3**) ( $\text{CDCl}_3$ , 400 MHz)

Page S20: HSQC Spectrum of Cornolactone B (**3**) ( $\text{CDCl}_3$ , 400 MHz)

Page S21: HMBC Spectrum of Cornolactone B (**3**) ( $\text{CDCl}_3$ , 400 MHz)

Page S22: NOESY Spectrum of Cornolactone B (**3**) ( $\text{CDCl}_3$ , 400 MHz)

Page S23:  $^1\text{H}$  NMR Spectrum of Cornolactone C (**4**) ( $\text{CDCl}_3$ , 400 MHz)

Page S24:  $^{13}\text{C}$  NMR Spectrum of Cornolactone C (**4**) ( $\text{CDCl}_3$ , 100 MHz)

Page S25:  $^1\text{H}$ – $^1\text{H}$  COSY Spectrum of Cornolactone C (**4**) ( $\text{CDCl}_3$ , 400 MHz)

Page S26: HSQC Spectrum of Cornolactone C (**4**) ( $\text{CDCl}_3$ , 400 MHz)

Page S27: HMBC Spectrum of Cornolactone C (**4**) ( $\text{CDCl}_3$ , 400 MHz)

Page S28: NOESY Spectrum of Cornolactone C (**4**) ( $\text{CDCl}_3$ , 400 MHz)

Page S29:  $^1\text{H}$  NMR Spectrum of Cornolactone D (**5**) ( $\text{CDCl}_3$ , 400 MHz)

Page S30:  $^{13}\text{C}$  NMR Spectrum of Cornolactone D (**5**) ( $\text{CDCl}_3$ , 100 MHz)

Page S31:  $^1\text{H}$ – $^1\text{H}$  COSY Spectrum of Cornolactone D (**5**) ( $\text{CDCl}_3$ , 400 MHz)

Page S32: HSQC Spectrum of Cornolactone D (**5**) ( $\text{CDCl}_3$ , 400 MHz)

Page S33: HMBC Spectrum of Cornolactone D (**5**) ( $\text{CDCl}_3$ , 400 MHz)

Page S34: NOESY Spectrum of Cornolactone D (**5**) ( $\text{CDCl}_3$ , 400 MHz)

### Extraction and Purification Procedures.

The leaves of *C. florida* (15.0 kg, dry weight) were extracted with 90% ethanol, and dried in *vacuo* to give a crude extract (900 g). A portion of this crude extract (400 g) was separated on a silica gel column (20 x 70 cm) using a stepwise gradient of hexanes/EtOAc (100:0, 80:20, 50:50 and 100:0, v/v, each 3 L) and EtOAc/CH<sub>3</sub>OH mixtures (80:20, 60:40, 50:50 and 0:100, v/v, each 3 L) to afford eight fractions (Fr. A – Fr. H). Fraction E (220 g) was then chromatographed on an HP-20 column (8 x 50 cm) using a stepwise gradient of acetone/water (10:90, 20:80, 50:50, 60:40, 80:20 and 100:0, v/v, each 2 L) to give six sub-fractions (Fr. E<sub>1</sub>– E<sub>6</sub>). Fraction E<sub>2</sub> (40 g) was chromatographed on a preparative C<sub>18</sub> reversed-phase MPLC column (20 x 250 mm; 20–35% CH<sub>3</sub>OH/H<sub>2</sub>O over 40 min, 35–65% CH<sub>3</sub>OH/H<sub>2</sub>O over 20 min; flow rate: 12 mL/min) to afford eight sub-fractions (Fr. E<sub>2a</sub>–E<sub>2h</sub>). Fraction E<sub>2d</sub> (4.0 g) was further chromatographed on a preparative C<sub>18</sub> reversed-phase HPLC (Shim-park RP-C<sub>18</sub> column; 5 μm; 20 x 250 mm; 8–45% CH<sub>3</sub>CN/H<sub>2</sub>O over 120 min, 7 mL/min) to yield eight sub-fractions (Fr. E<sub>2d-1</sub> to Fr. E<sub>2d-8</sub>). Fraction E<sub>2d-1</sub> and Fraction E<sub>2d-2</sub> were combined and chromatographed on a preparative C<sub>18</sub> reversed-phase HPLC (Shim-park RP-C<sub>18</sub> column; 5 μm; 20 x 250 mm; 5–35% CH<sub>3</sub>CN/H<sub>2</sub>O over 50 min, 35–100% CH<sub>3</sub>OH/H<sub>2</sub>O over 10 min, 7 mL/min) to give cornin (9.7 mg, *t*<sub>R</sub> 31.6 min), dihydrocornin (2.0 mg, *t*<sub>R</sub> 34.4 min). Fraction E<sub>2d-3</sub> (30.0 mg) was chromatographed by preparative C<sub>18</sub> reversed-phase HPLC (Shim-park RP-C<sub>18</sub> column; 5 μm; 20 x 250 mm; 15–45% CH<sub>3</sub>OH/H<sub>2</sub>O over 50 min, 7 mL/min) to give hastatoside (3.5 mg, *t*<sub>R</sub> 34.3 min). Sub-fraction E<sub>2d-4</sub> (50 mg) was purified by C<sub>8</sub> reversed phase HPLC (Polar-C<sub>8</sub>; 5 μm; 20 x 250 mm; 15–45% CH<sub>3</sub>OH/H<sub>2</sub>O over 130 min, 5 mL/min) to yield cornusoside A (**1**, 5.0 mg, *t*<sub>R</sub> 76.2 min) and cornalternoside (10.2 mg, *t*<sub>R</sub> 80.4 min). Then, Fraction E<sub>2d-6</sub> (832 mg) was subjected to silica gel column (6 x 70 cm) chromatography using CH<sub>2</sub>Cl<sub>2</sub>-MeOH (90:10 to 0:100, v/v, each 500 mL) to

afford nine fractions (Fr. E<sub>2d-6-a</sub> to Fr. E<sub>2d-6-h</sub>). Fraction F<sub>2d-6-a</sub> (320 mg) was purified by C<sub>8</sub> reversed-phase HPLC (Polar-C<sub>8</sub>; 5  $\mu$ m; 20 x 250 mm; 20–65% CH<sub>3</sub>OH/H<sub>2</sub>O over 70 min, 5 mL/min) to yield two fractions. The first fraction (60 mg) was purified on a polymeric HPLC column (Hamilton PRP-1; 5  $\mu$ m; 20 x 250 mm; 10–40% CH<sub>3</sub>CN/H<sub>2</sub>O over 50 min, 7 mL/min) to yield cornolactone C (**4**, 8.0 mg, *t<sub>R</sub>* 41.5 min). The second fraction (40 mg) was purified on a polymeric HPLC column (Hamilton PRP-1; 5  $\mu$ m; 20 x 250 mm; 15–45% CH<sub>3</sub>CN in H<sub>2</sub>O for 70 min, 7 mL/min) to yield cornolactone B (**3**, 4.0 mg, *t<sub>R</sub>* 37.9 min).

The remaining crude extract (500 g) was loaded on to a silica gel column (20 x 70 cm) and eluted using a stepwise gradient of hexanes/EtOAc (100:0, 80:20, 50:50 and 0:100, v/v, each 4 L) and EtOAc/CH<sub>3</sub>OH mixtures (80:20, 60:40, 50:50 and 0:100, v/v, each 4 L) to afford eight fractions. Fraction E (320 g) was then fractionated on a HP-20 column (20 x 70 cm) with a stepwise gradient of acetone/water (5:95, 10:90, 15:85, 20:80, 30:70, 40:60, 50:50, 60:40, 80:20 and 100:0, v/v, each 3 L) to give ten sub-fractions (Fr. E<sub>1</sub> to Fr. E<sub>10</sub>). Fraction E<sub>2</sub> and Fraction E<sub>3</sub> were combined (50 g) and chromatographed on a polymeric HP-20SS column (10 x 60 cm) using a stepwise gradient elution of acetone/water (5:95, 10:90, 15:85, 20:80, 25:75, 30:70, 40:60, 60:40, 80:20 and 100:0, v/v, each 1 L) to give ten sub-fractions (Fr. E<sub>3a</sub> to Fr. E<sub>3j</sub>). Fraction E<sub>3e</sub> (120 mg) was then chromatographed on a silica gel column (6 x 60 cm) using a stepwise gradient from 10% MeOH in CH<sub>2</sub>Cl<sub>2</sub> to 100% MeOH to yield 3,3'-dimethyl-4-*O*- $\beta$ -D-glucopyranosyl ellagic acid (3.0 mg) and 3,4,3'-trimethyl-4-*O*- $\beta$ -D-glucopyranosyl ellagic acid (2.5 mg). Fraction E<sub>3b</sub> (9.9 g) was fractionated on a reversed phase C<sub>18</sub> column (4 x 60 cm) using a stepwise gradient of MeOH/H<sub>2</sub>O (5:95, 10:90, 15:85, 20:80, 30:70, 40:60, 50:50, 60:40, 80:20 and 100:0, v/v, each 500 mL) to afford ten fractions (Fr. E<sub>3b-A</sub> to Fr. E<sub>3b-I</sub>). The first two fractions were combined (Fr. E<sub>3b-A+B</sub>, 1.2 g) and chromatographed on a Sephadex LH-20 column (4 x 60

cm) using methanol to afford four sub-fractions (Fr. E<sub>3b-A+B-1</sub> to Fr. E<sub>3b-A+B-4</sub>). Fraction E<sub>3b-A+B-2</sub> (960 mg) was separated by preparative reversed-phase C<sub>18</sub> HPLC (Shim-park RP-C<sub>18</sub> column; 5  $\mu$ m; 20 x 250 mm; 5–50% CH<sub>3</sub>CN/H<sub>2</sub>O over 50 min, 50–100% over 10 min, 7 mL/min) to yield five fractions (Fr. E<sub>3b-A+B-2-a</sub> to Fr. E<sub>3b-A+B-2-e</sub>) with  $t_R$  at 33.9, 36.0, 36.8, 38.7 and 39.6 min, respectively. Fraction E<sub>3b-A+B-2-a</sub> (97.5 mg) was separated on reversed-phase C<sub>18</sub> HPLC (Shim-park RP-C<sub>18</sub> column; 5  $\mu$ m; 20 x 250 mm; 5–40% CH<sub>3</sub>CN/H<sub>2</sub>O over 70 min, 50–100% CH<sub>3</sub>CN/H<sub>2</sub>O over 10 min, 7 mL/min) to yield cornolactone D (**5**, 12 mg,  $t_R$  51.5 min). Fraction E<sub>3b-A+B-2-b</sub> (71.4 mg) was purified on reversed-phase C<sub>8</sub> HPLC column (Polar-C<sub>8</sub>, 5  $\mu$ m; 20 x 250 mm; 10–40% CH<sub>3</sub>CN/H<sub>2</sub>O over 70 min, 50–100% over 10 min, 7 mL/min) to yield alternoside A (5.0 mg,  $t_R$  11.8 min). Fraction E<sub>3b-A+B-2-c</sub> (51.0 mg) was also purified using reversed-phase C<sub>8</sub> HPLC (Polar-C<sub>8</sub>, 5  $\mu$ m; 20 x 250 mm; 20–60% CH<sub>3</sub>OH/H<sub>2</sub>O over 70 min, 7 mL/min) to yield cornolactone A (**2**, 15.0 mg,  $t_R$  51.1 min) and laurosides A (5.6 mg,  $t_R$  63.8 min). Additionally, Fraction E<sub>3b-A+B-2-d</sub> (632 mg) was also purified using reversed-phase C<sub>8</sub> HPLC (Polar-C<sub>8</sub>, 5  $\mu$ m; 20 x 250 mm; 10–20% CH<sub>3</sub>OH/H<sub>2</sub>O over 70 min, 5 mL/min) to obtain cornoside A (**1**, 60.0 mg,  $t_R$  44.0 min) and (5*S*<sup>\*</sup>,6*R*<sup>\*</sup>)-9-hydroxymegastigm-7-en-3-one (20.0 mg,  $t_R$  55.1 min). Finally Fraction E<sub>3</sub> (20 g) was fractionated on a silica gel column (5 x 60 cm) and eluted using a stepwise gradient of CH<sub>2</sub>Cl<sub>2</sub>/MeOH (90:10 to 0:100, v/v, each 500 mL) to afford nine fractions (Fr. E<sub>3-a</sub> to Fr. E<sub>3-h</sub>). The sub-fraction E<sub>3-b</sub> (30 mg) was further purified by reversed-phase C<sub>8</sub> HPLC (Polar-C<sub>8</sub>; 5  $\mu$ m; 10 x 250 mm; 10–65% CH<sub>3</sub>CN/H<sub>2</sub>O over 70 min, 5 mL/min) to yield isoquercitrin (5.2 mg,  $t_R$  60.6 min).

<sup>1</sup>H NMR Spectrum of Cornusoside A (1) (DMSO-*d*<sub>6</sub>, 400 MHz)

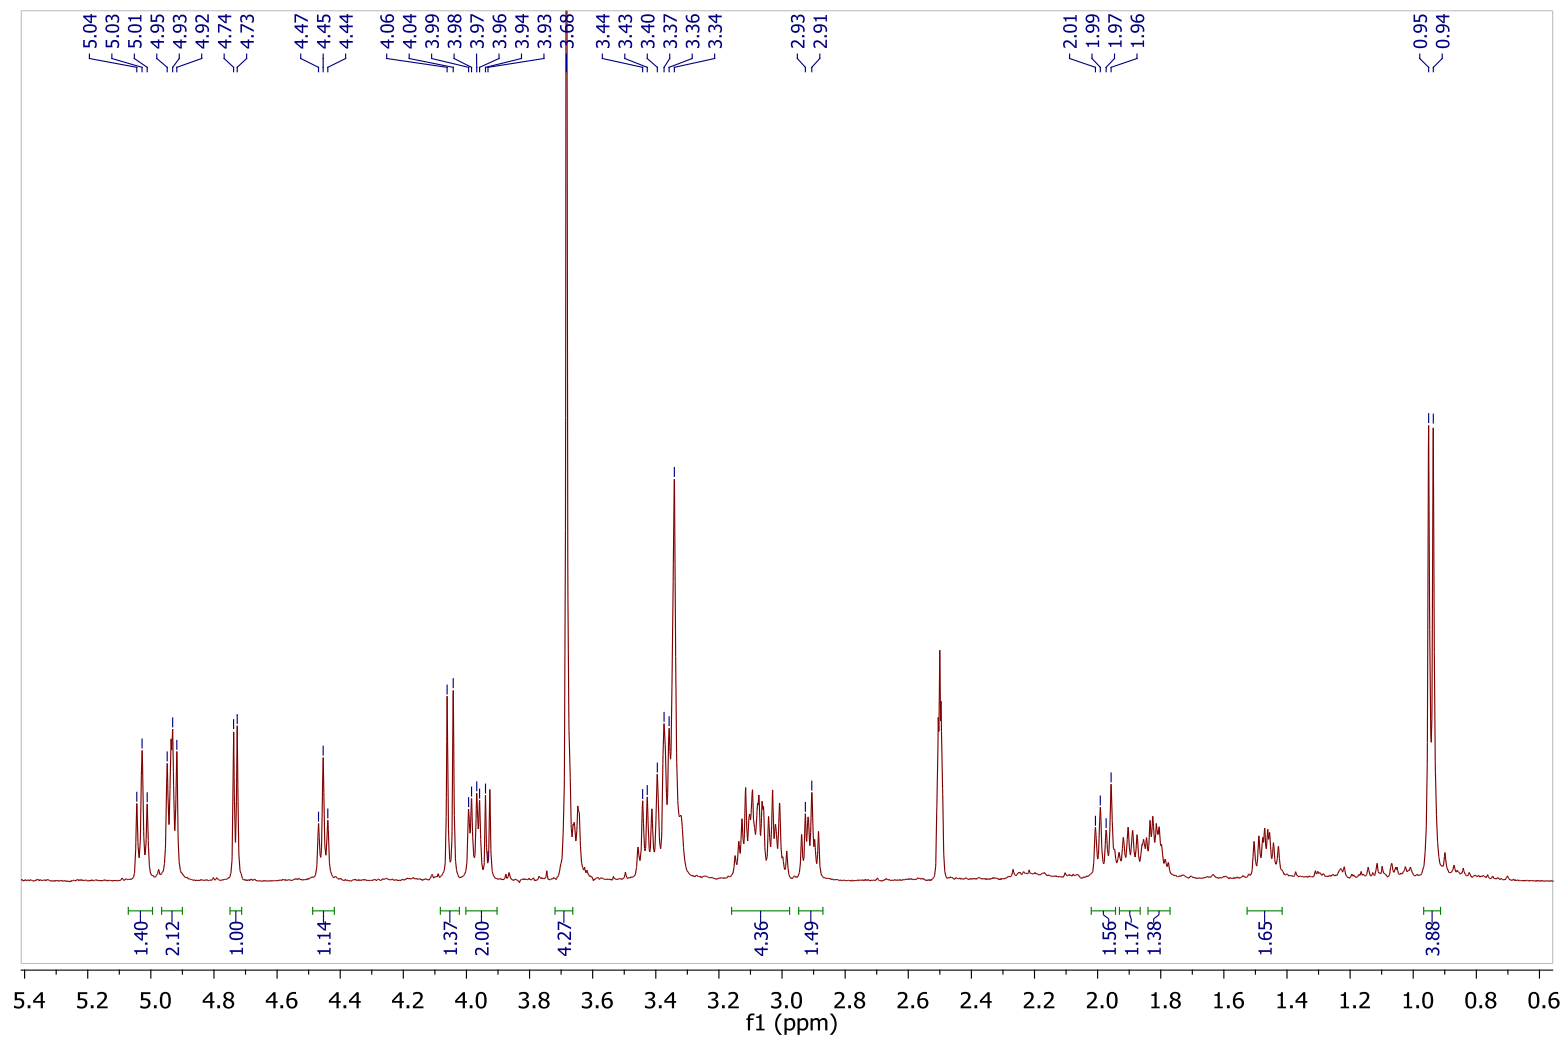

$^{13}\text{C}$  NMR Spectrum of Cornusoside A (**1**) (DMSO- $d_6$ , 100 MHz)

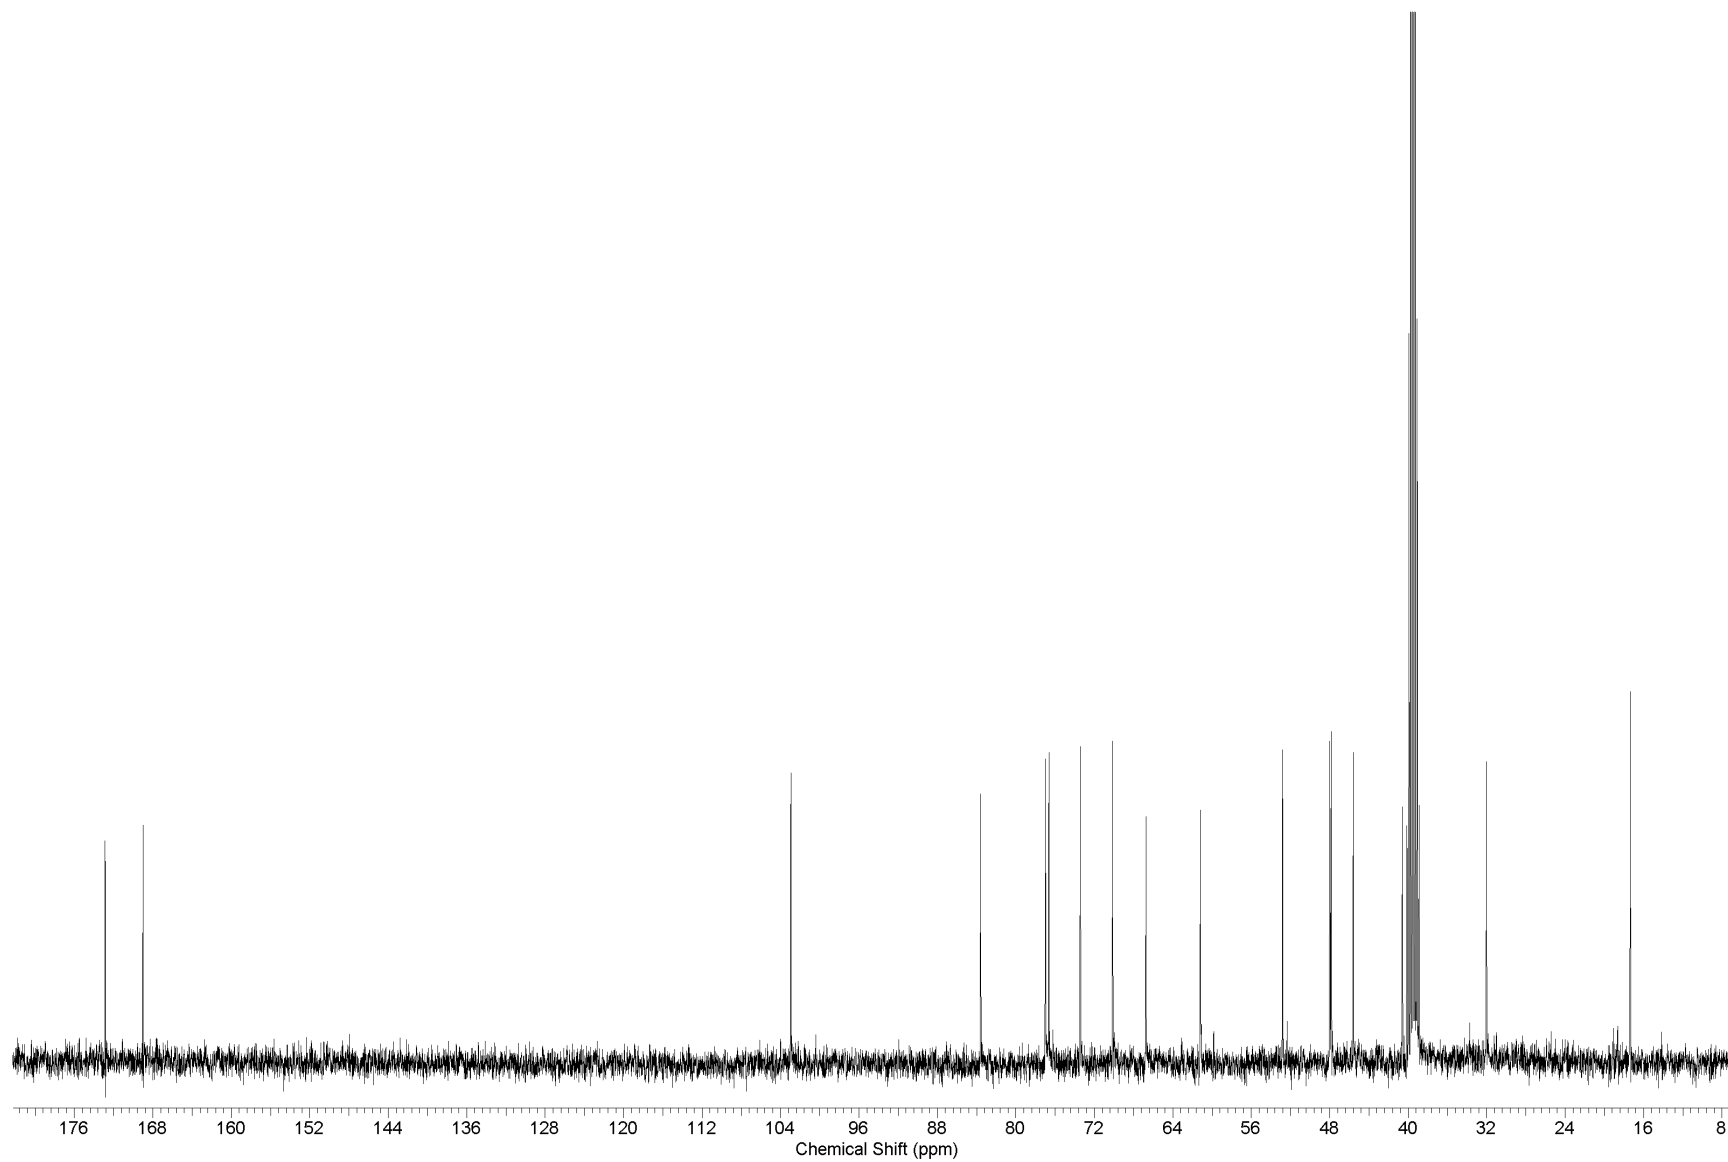

$^1\text{H}$ - $^1\text{H}$  COSY Spectrum of Cornusoside A (**1**) (DMSO- $d_6$ , 400 MHz)

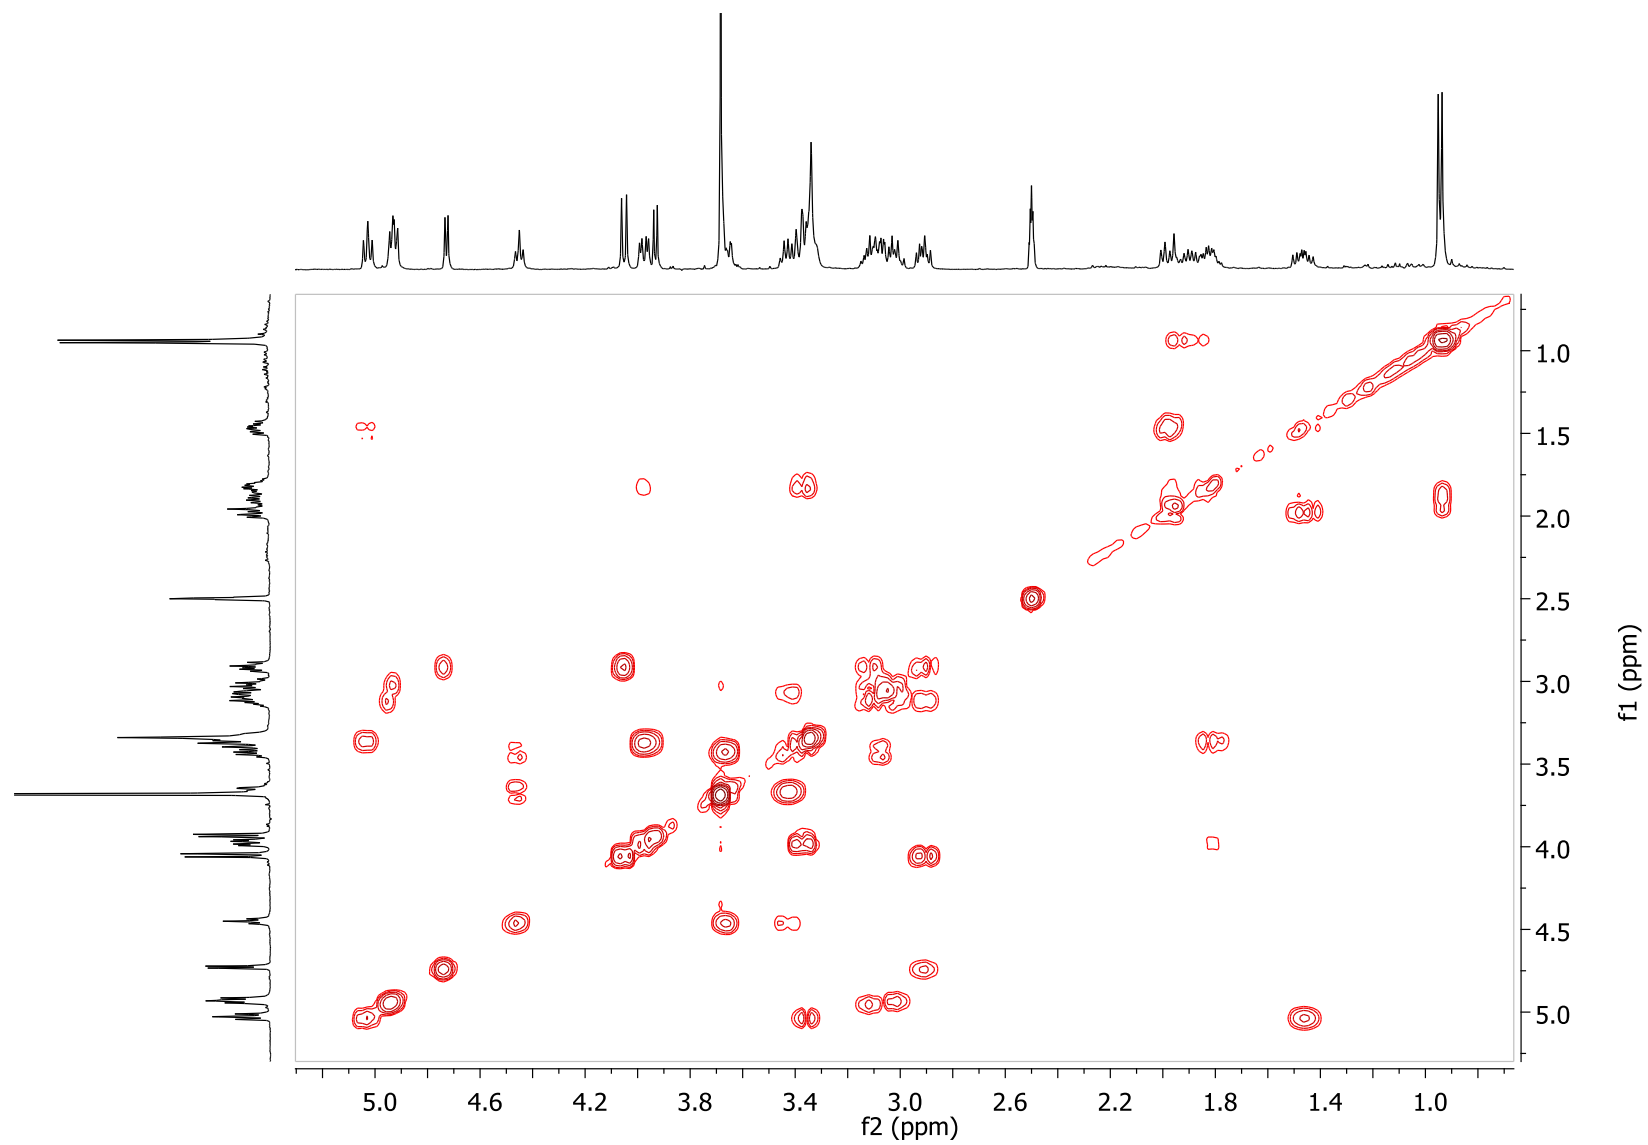

HSQC Spectrum of Cornusoside A (1) (DMSO-*d*<sub>6</sub>, 400 MHz)

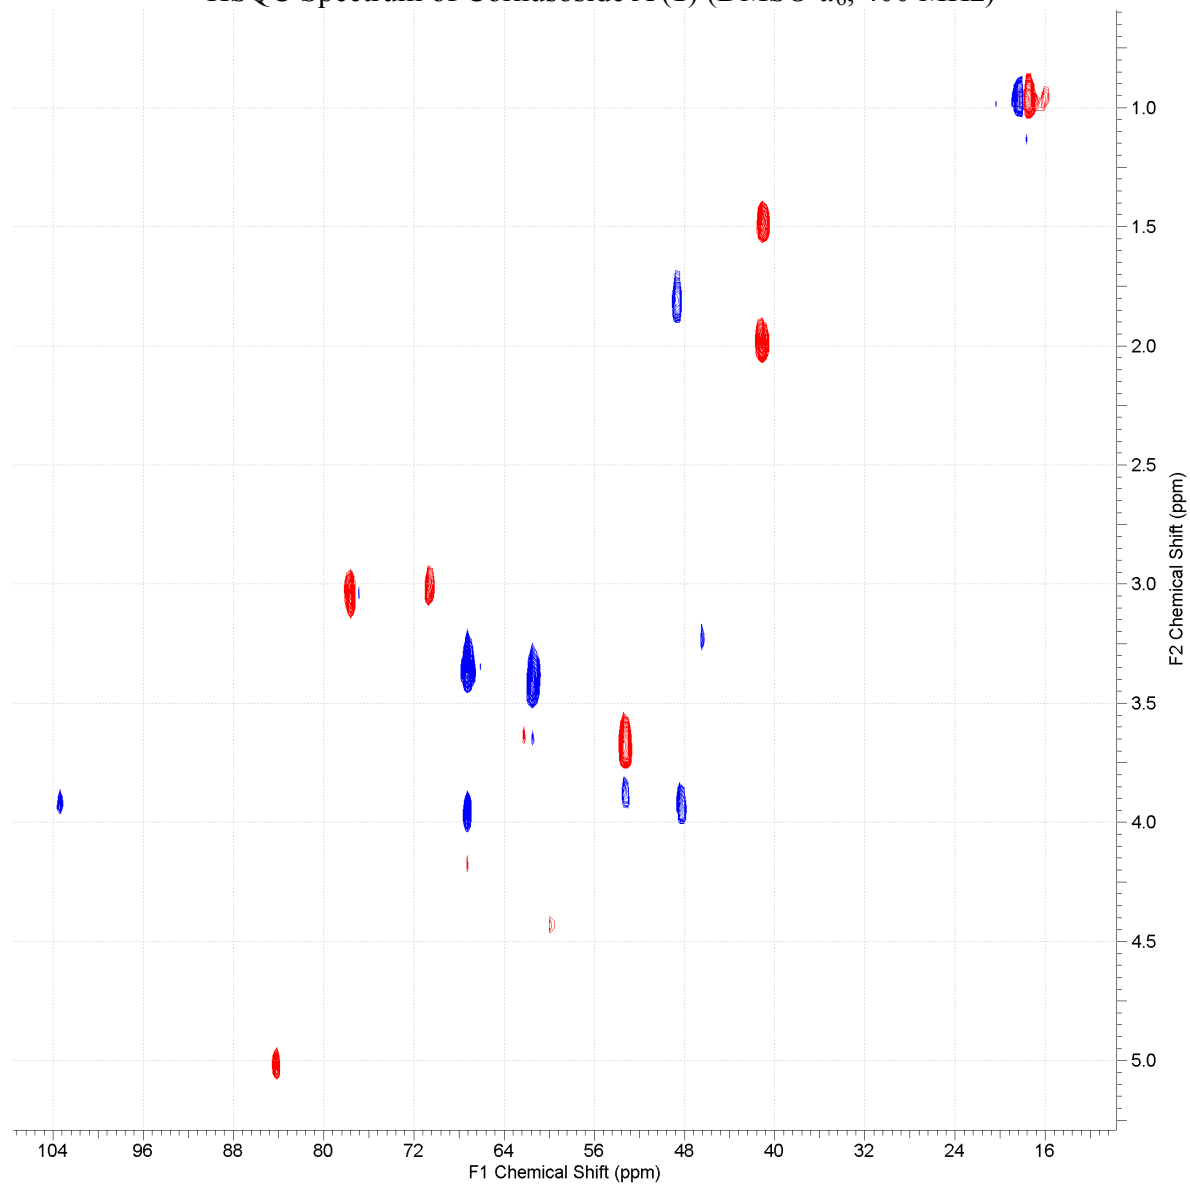



HMBC spectrum of Cornusoside A (1) (DMSO-*d*<sub>6</sub>, 400 MHz)

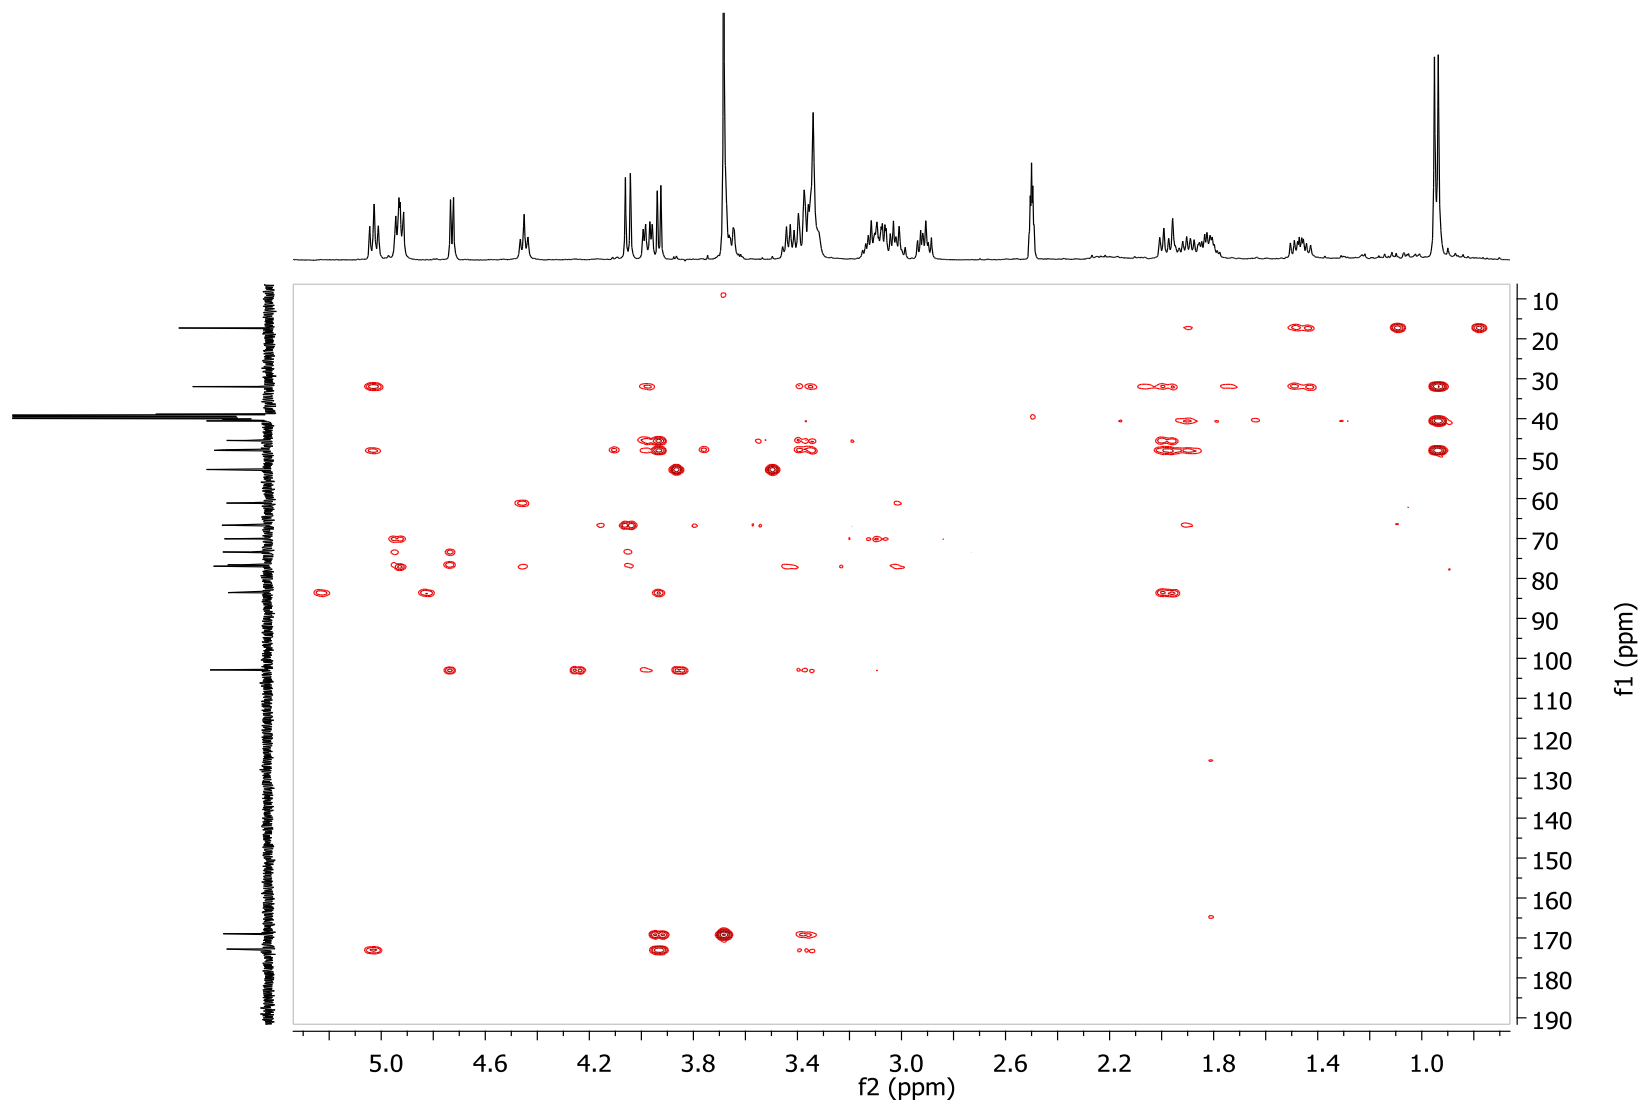

NOESY Spectrum of Cornusoside A (**1**) (DMSO-*d*<sub>6</sub>, 400 MHz)

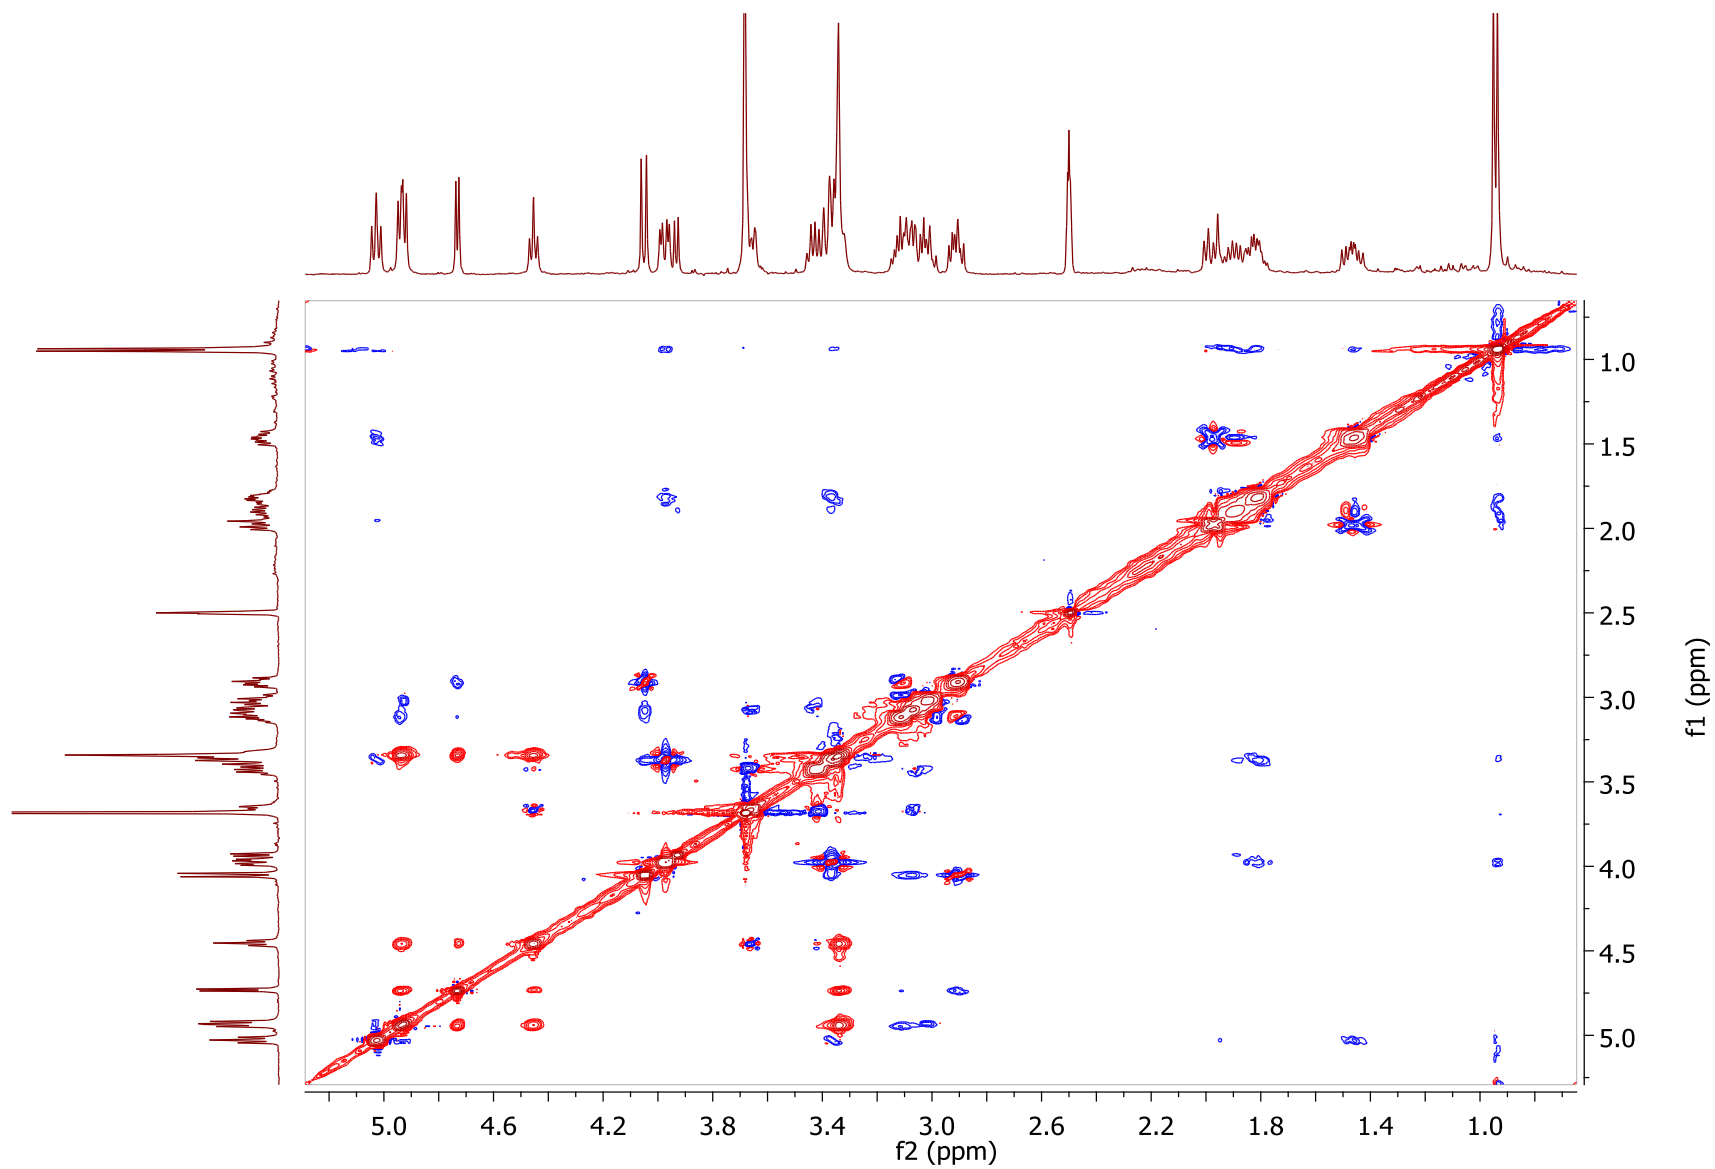

$^1\text{H}$  NMR Spectrum of Cornolactone A (**2**) ( $\text{CDCl}_3$ , 400 MHz)

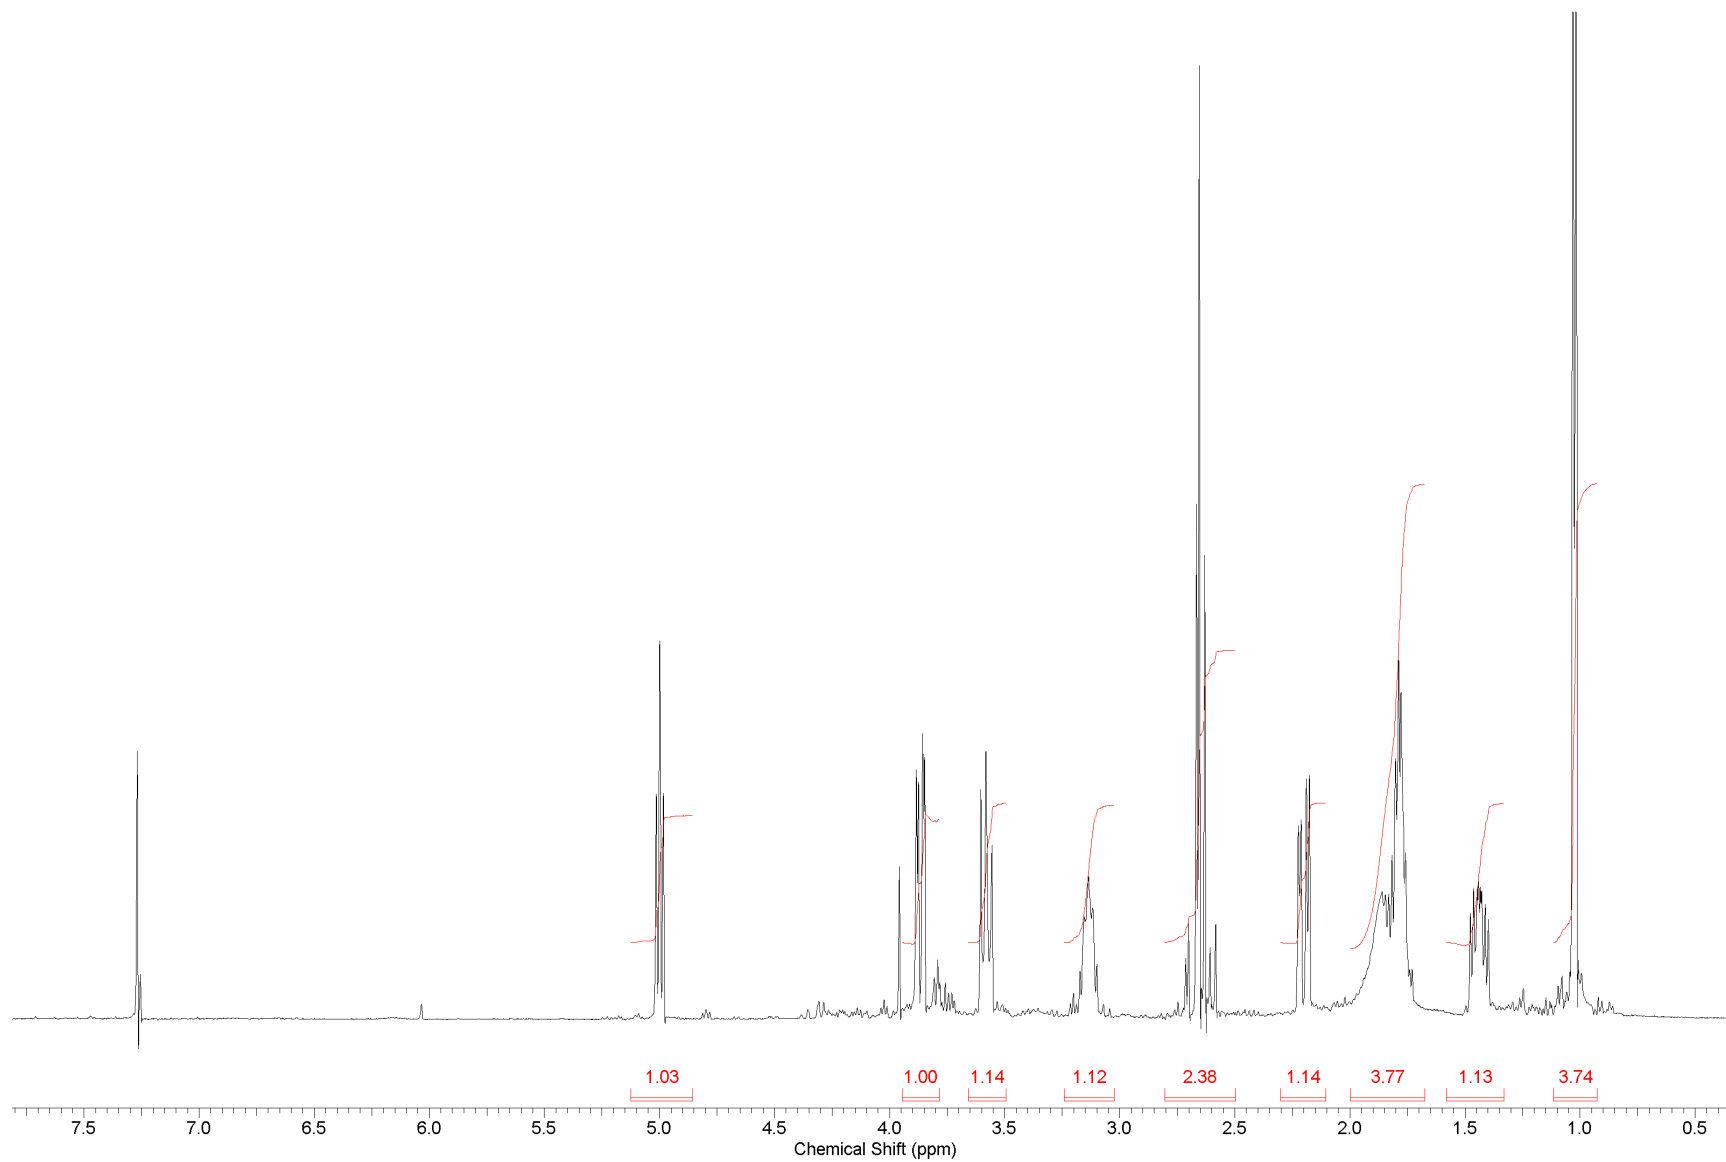

$^{13}\text{C}$  NMR Spectrum of Cornolactone A (**2**) ( $\text{CDCl}_3$ , 100 MHz)

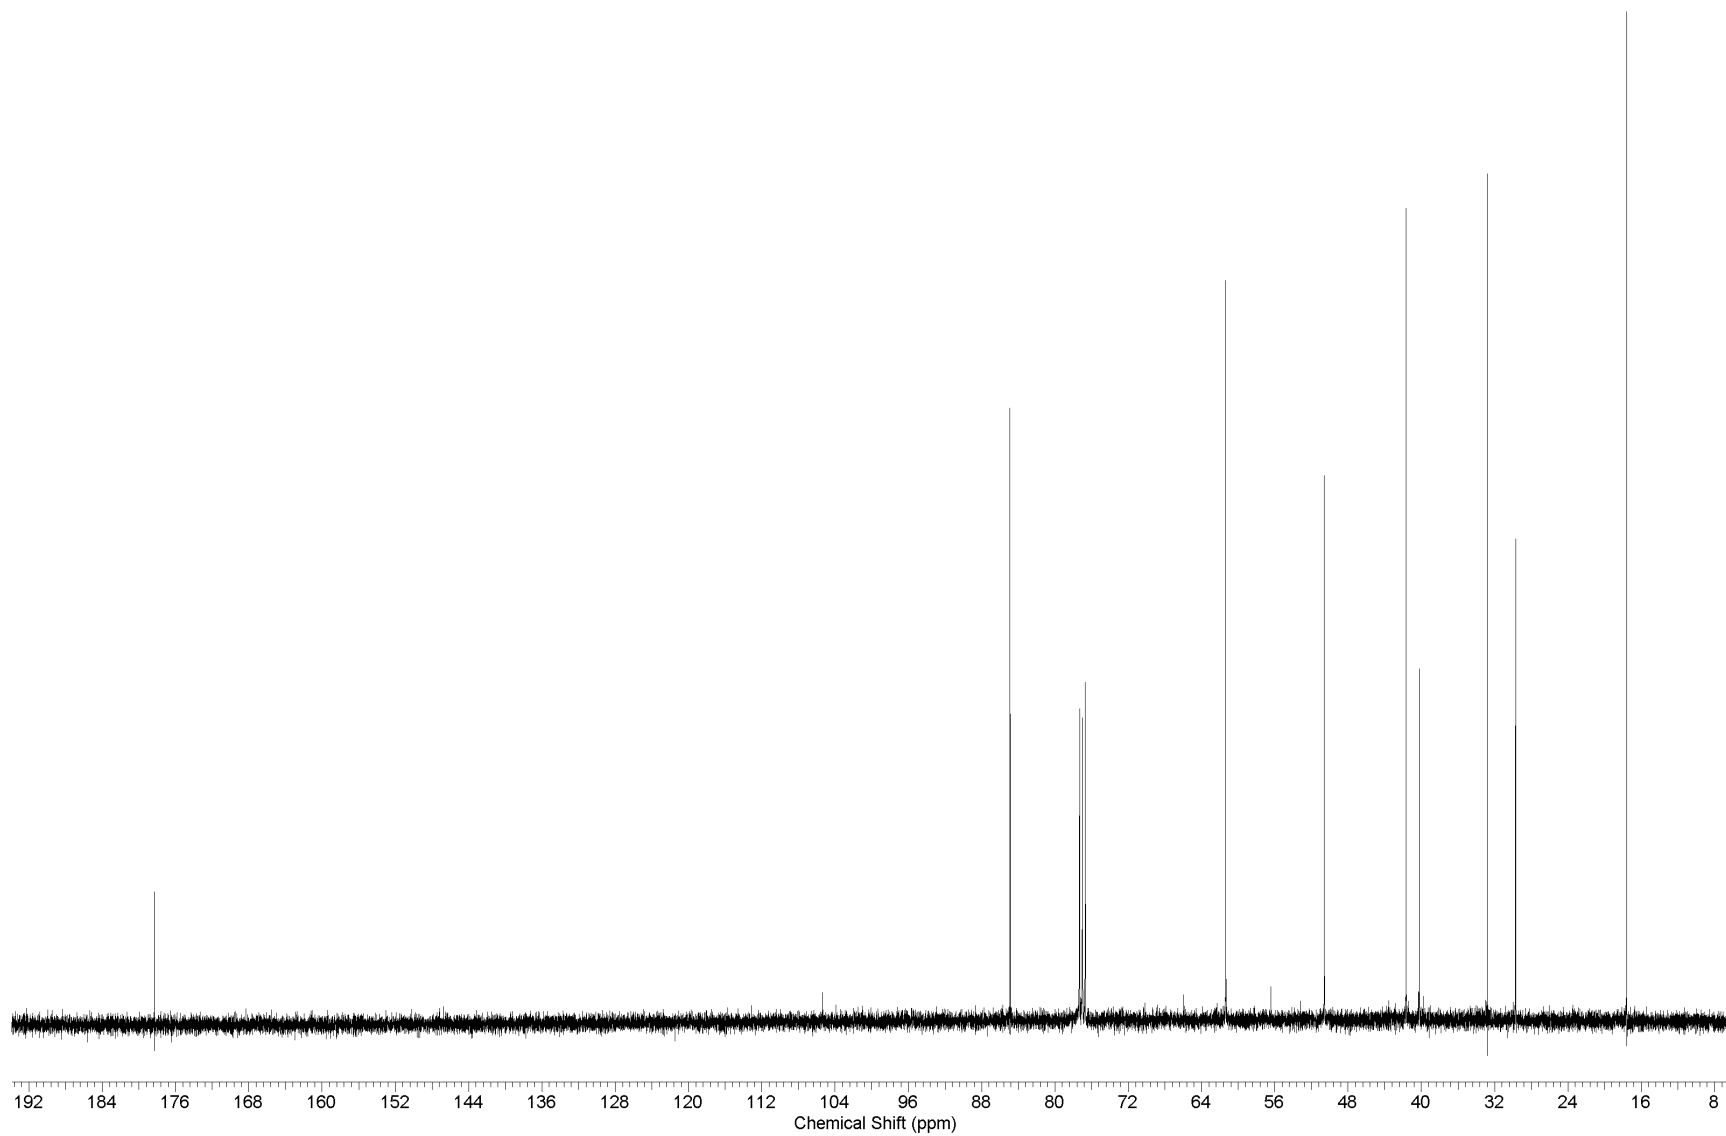

$^1\text{H}$ - $^1\text{H}$  COSY Spectrum of Cornolactone A (**2**) ( $\text{CDCl}_3$ , 400 MHz)

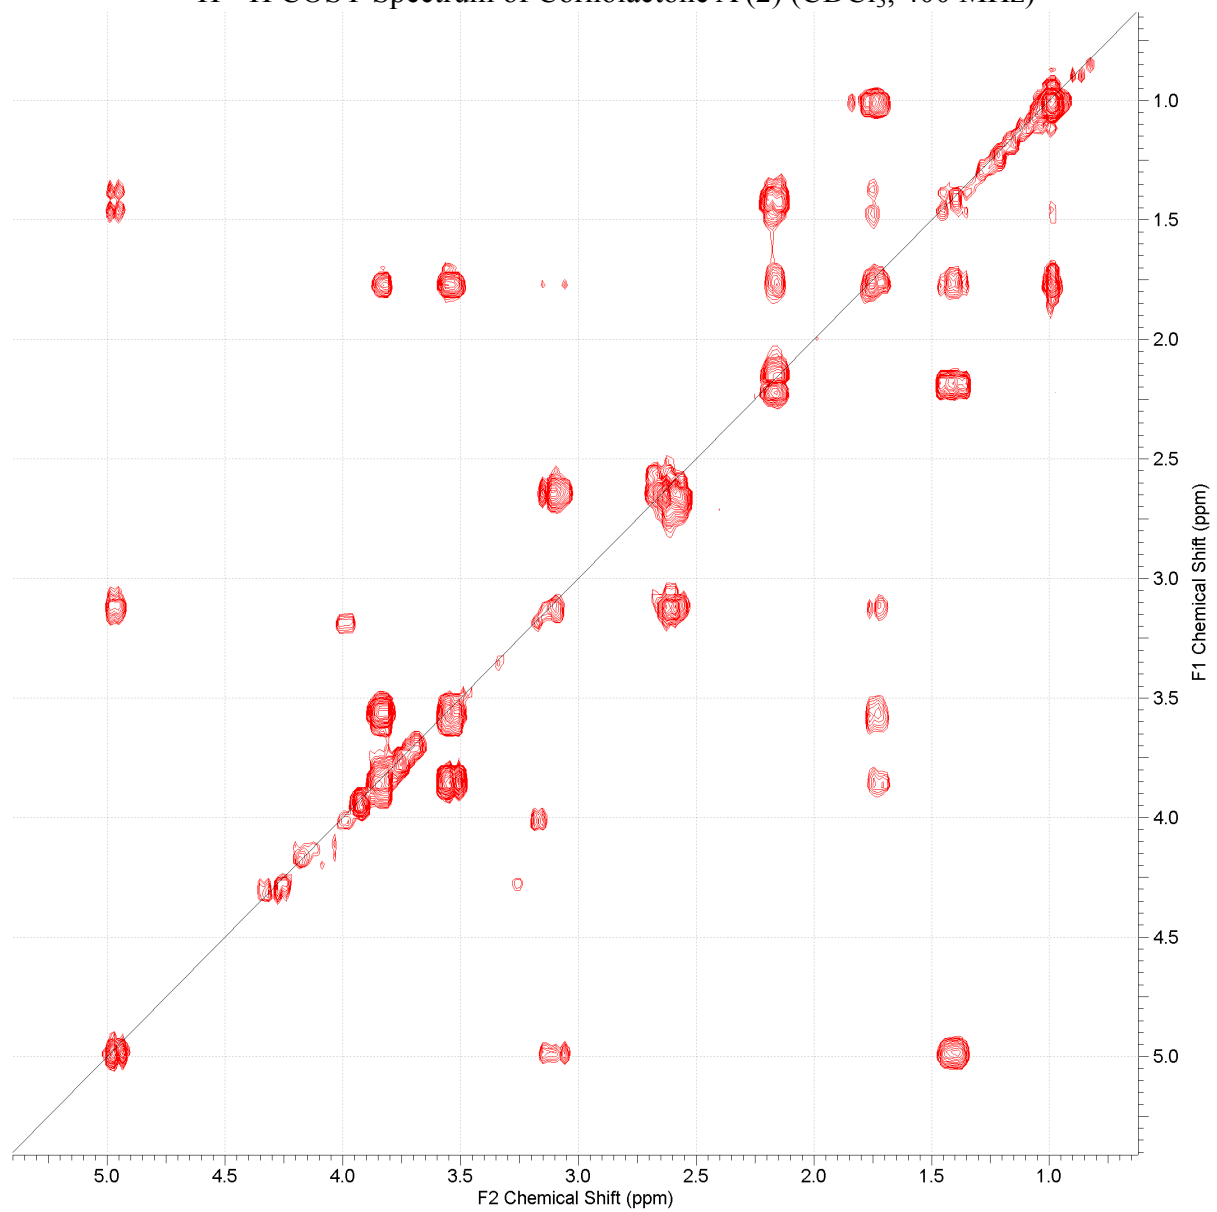

HSQC Spectrum of Cornolactone A (2) (CDCl<sub>3</sub>, 400 MHz)

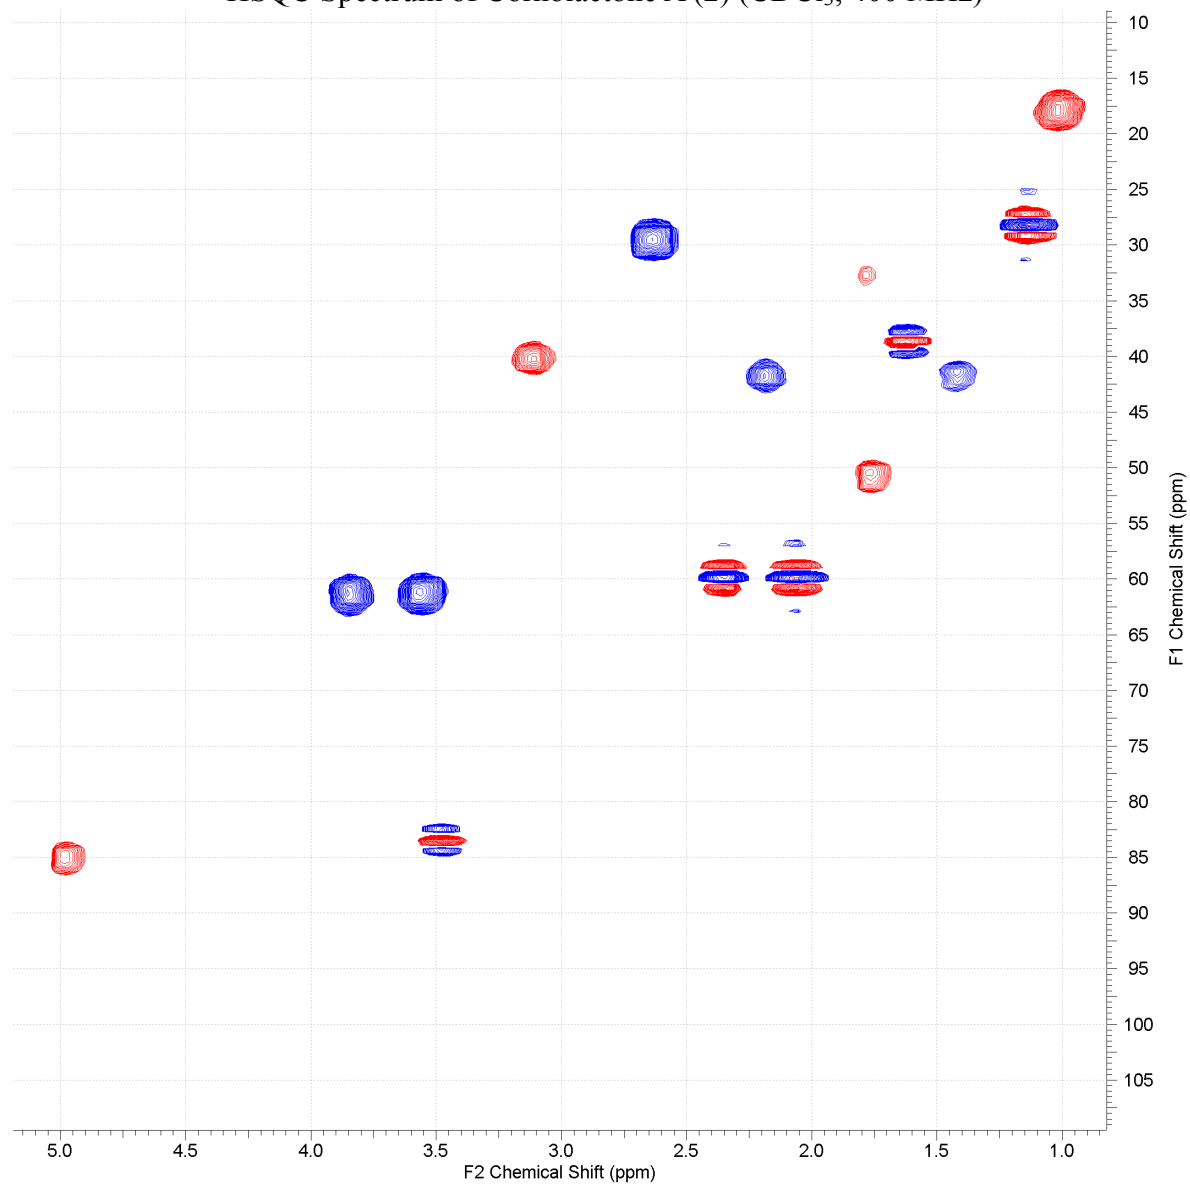

HMBC Spectrum of Cornolactone A (2) (CDCl<sub>3</sub>, 400 MHz)

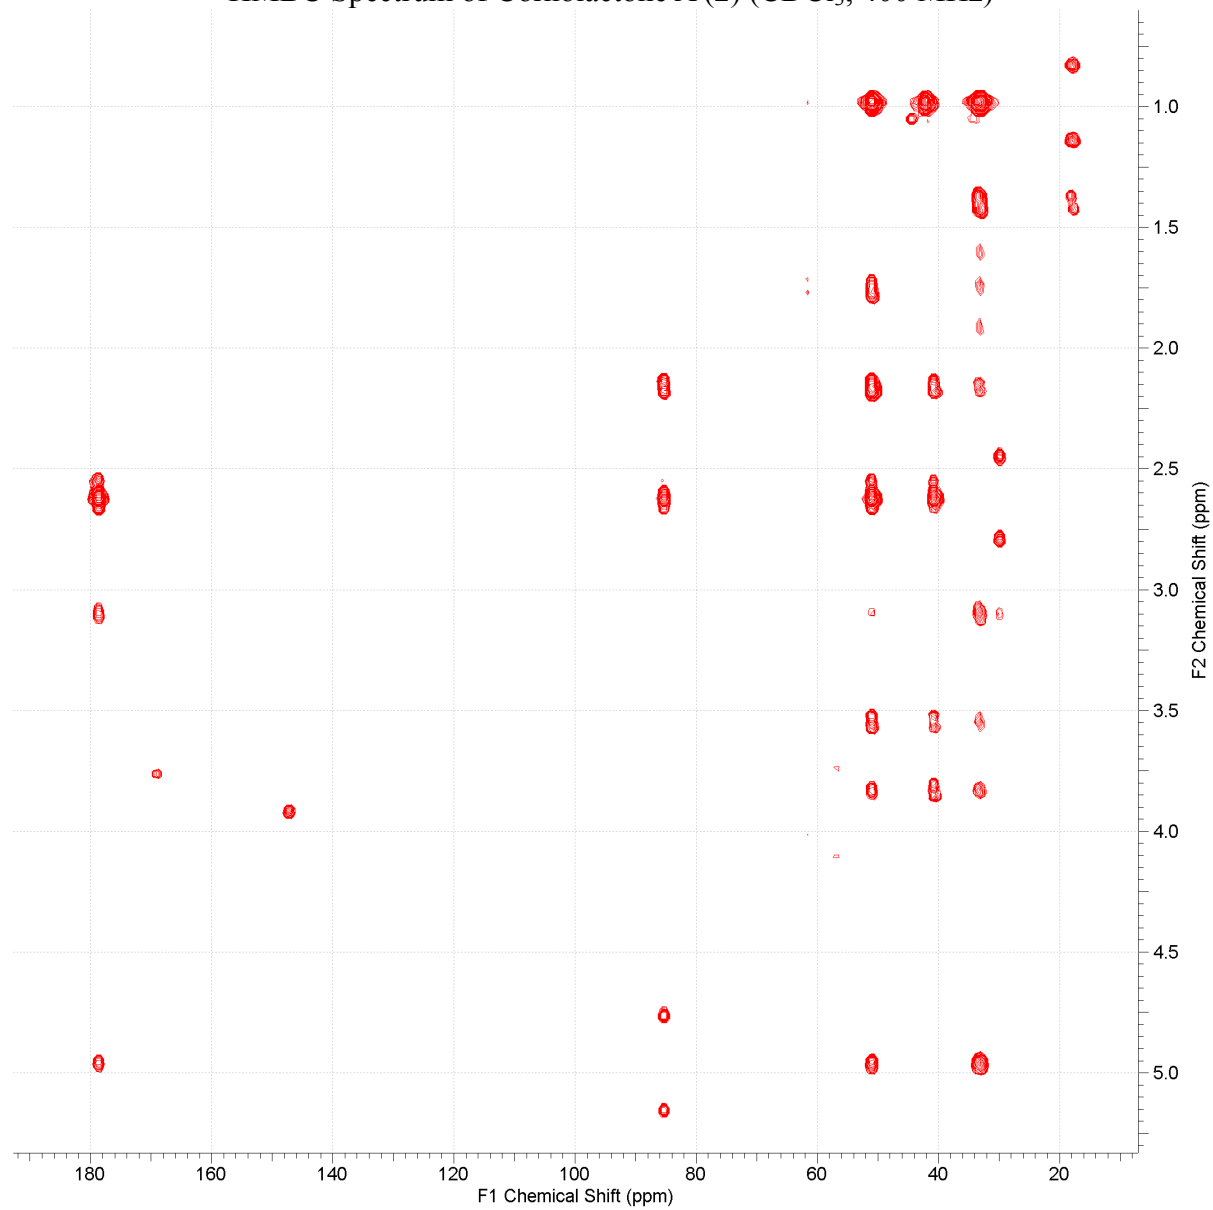

NOESY Spectrum of Cornolactone A (2) (CDCl<sub>3</sub>, 400 MHz)

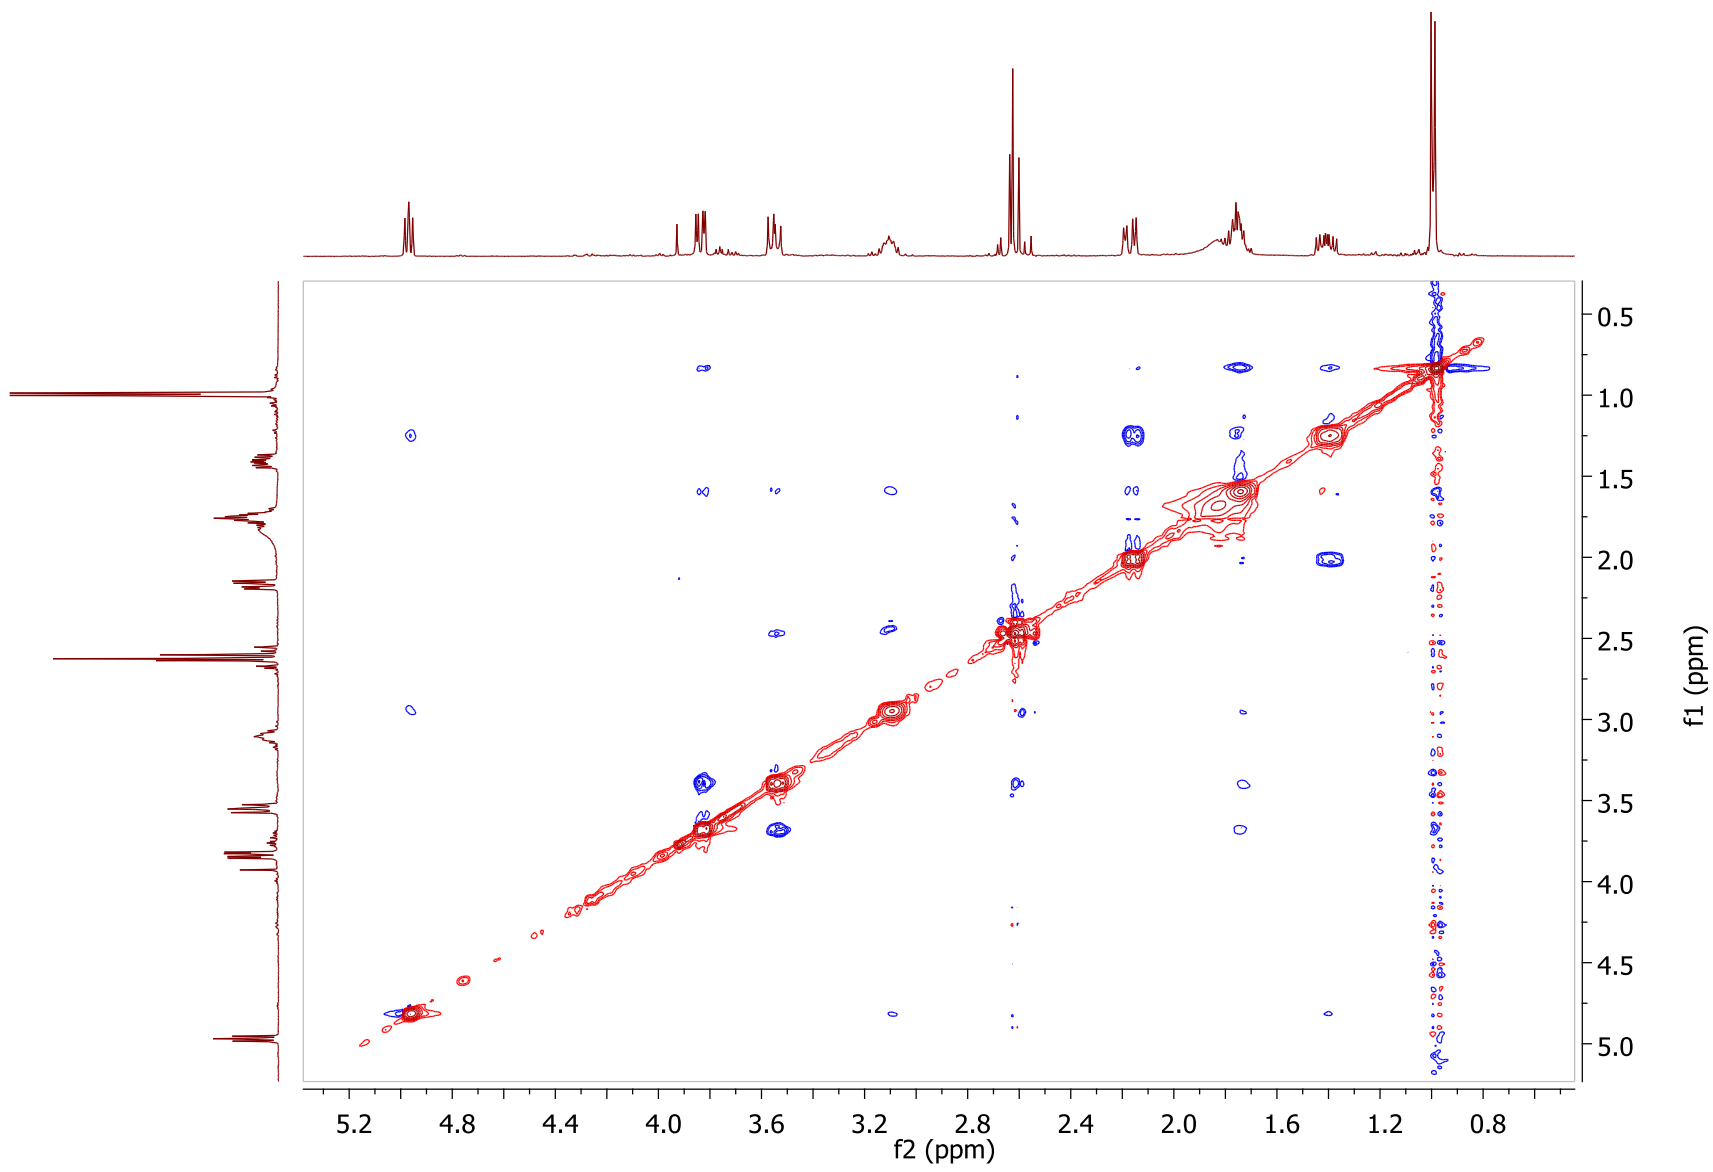



<sup>1</sup>H NMR Spectrum of Cornolactone B (**3**) (CDCl<sub>3</sub>, 400 MHz)

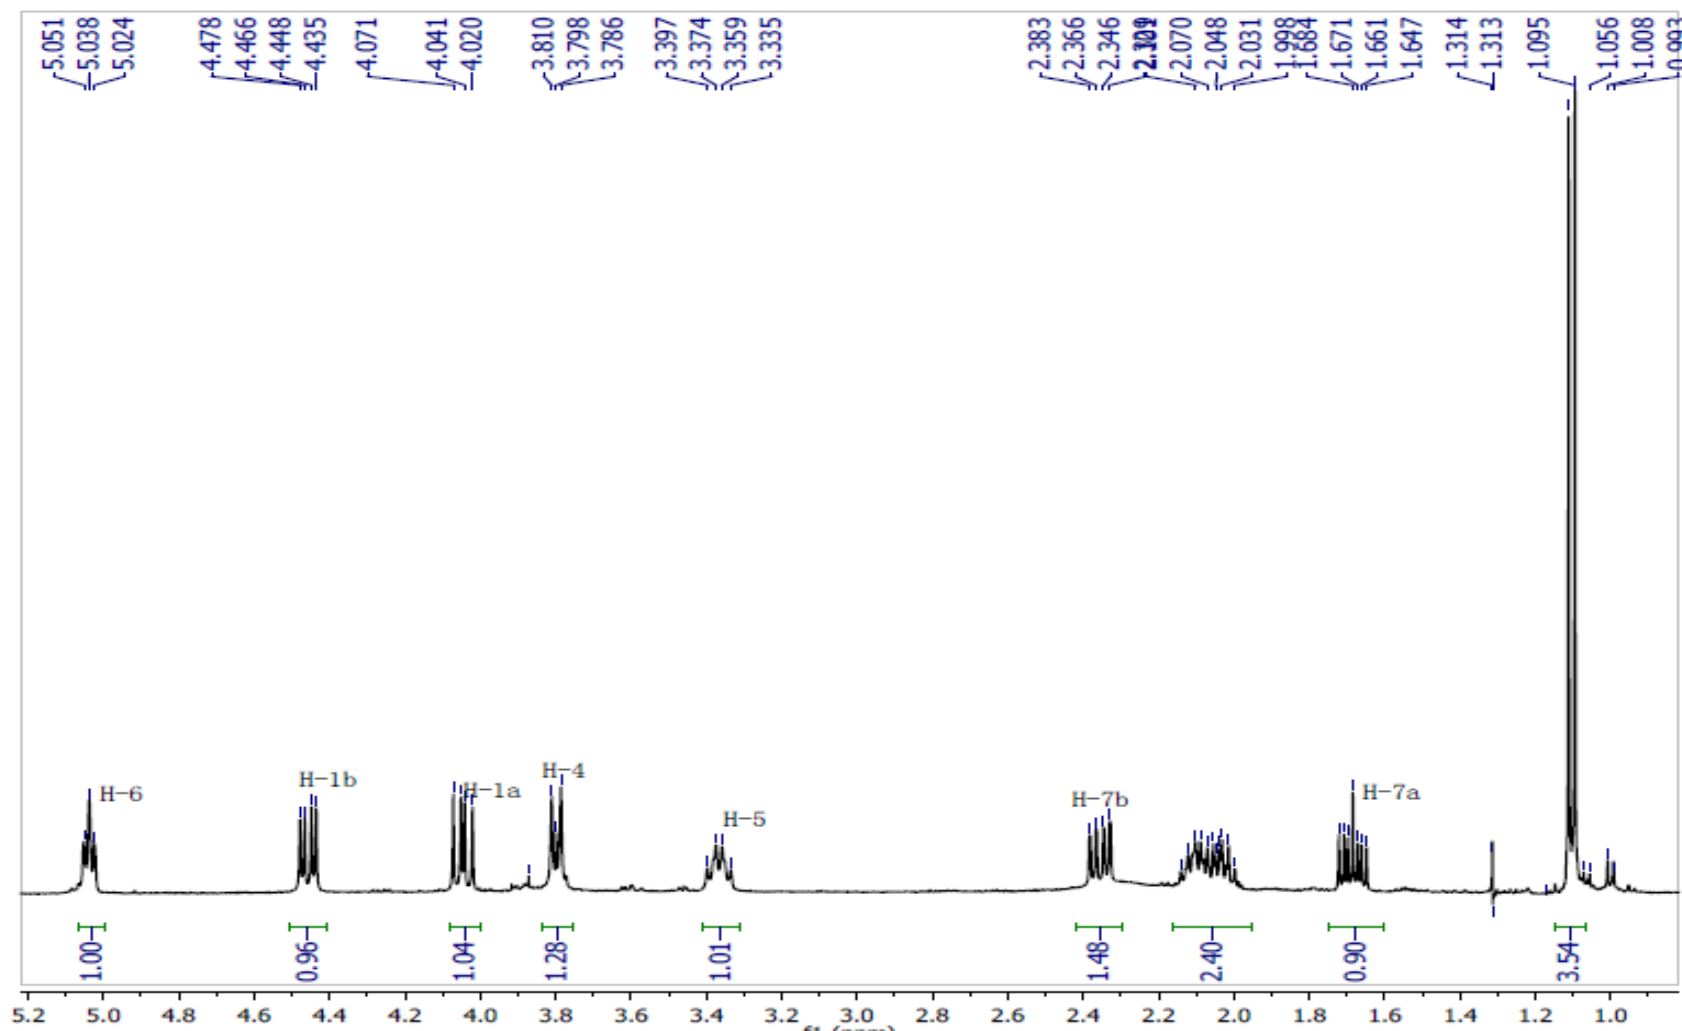

$^{13}\text{C}$  NMR Spectrum of Cornolactone B (**3**) ( $\text{CDCl}_3$ , 400 MHz)

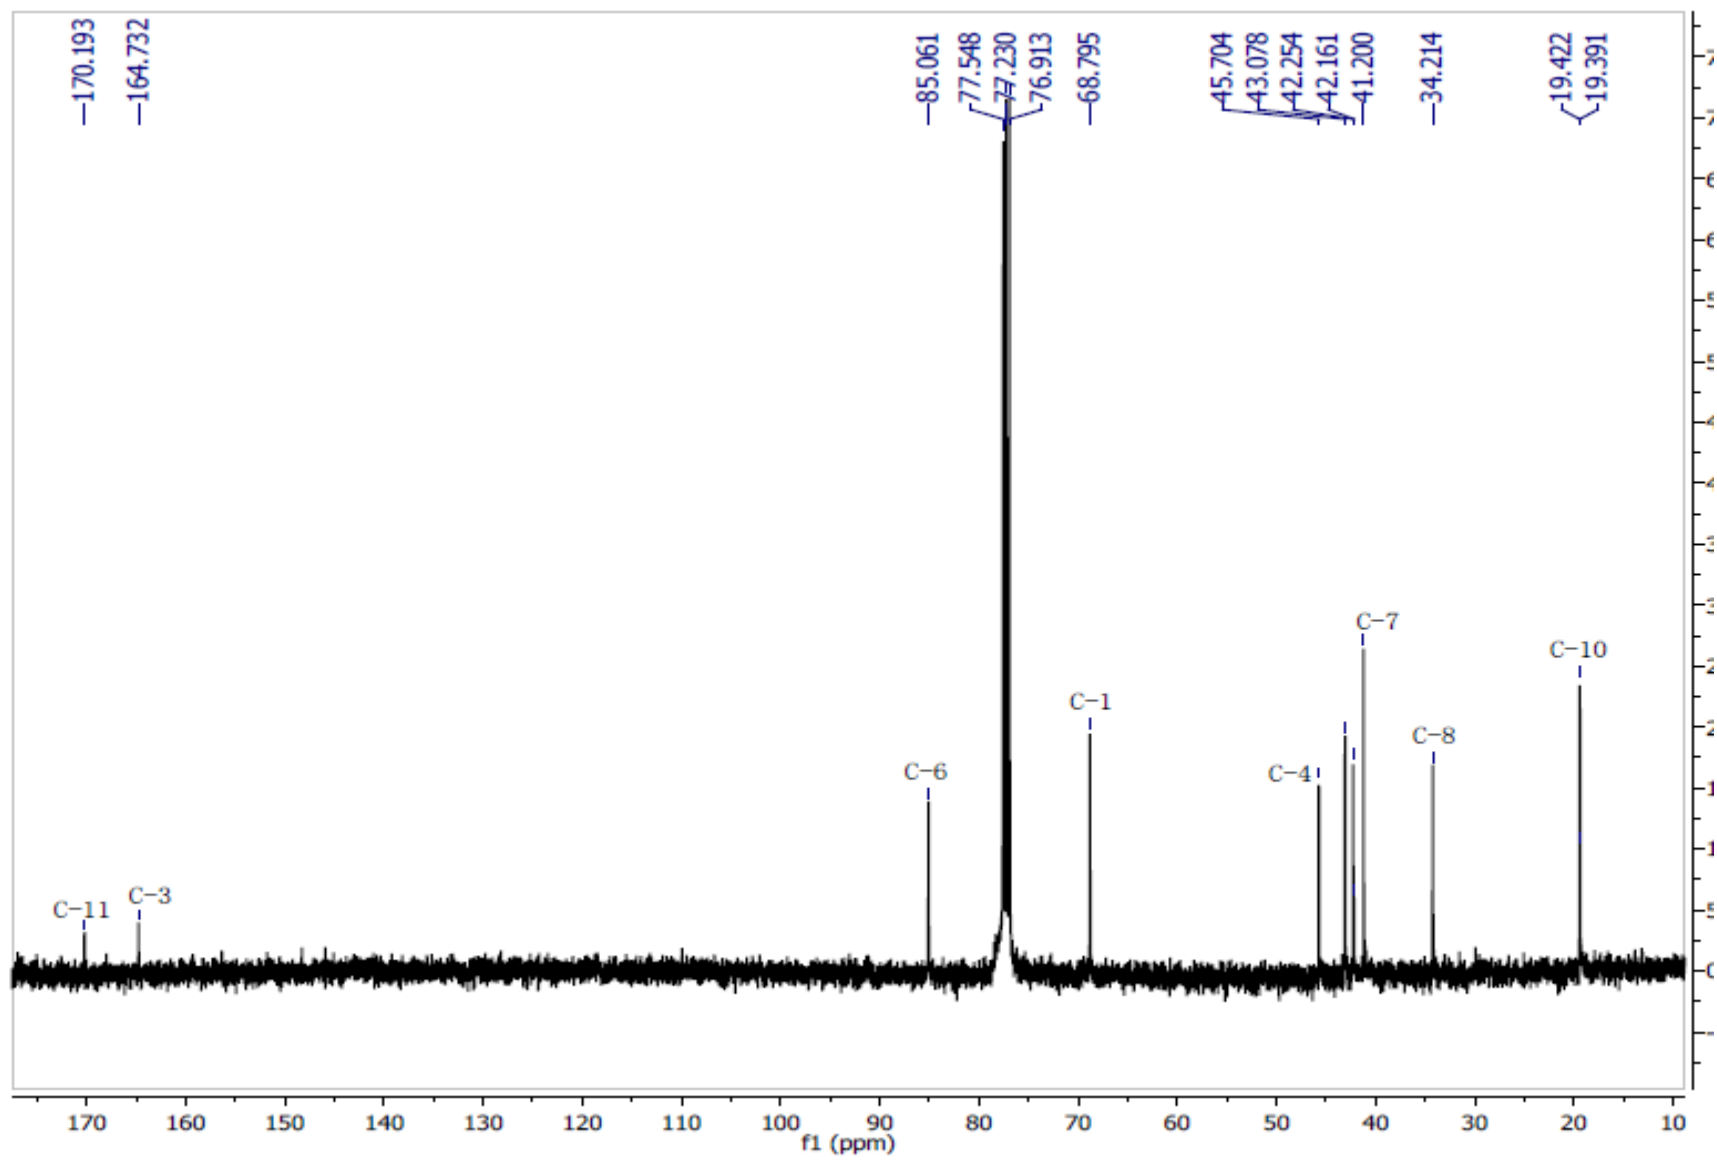

$^1\text{H}$ - $^1\text{H}$  COSY Spectrum of Cornolactone B (**3**) ( $\text{CDCl}_3$ , 400 MHz)

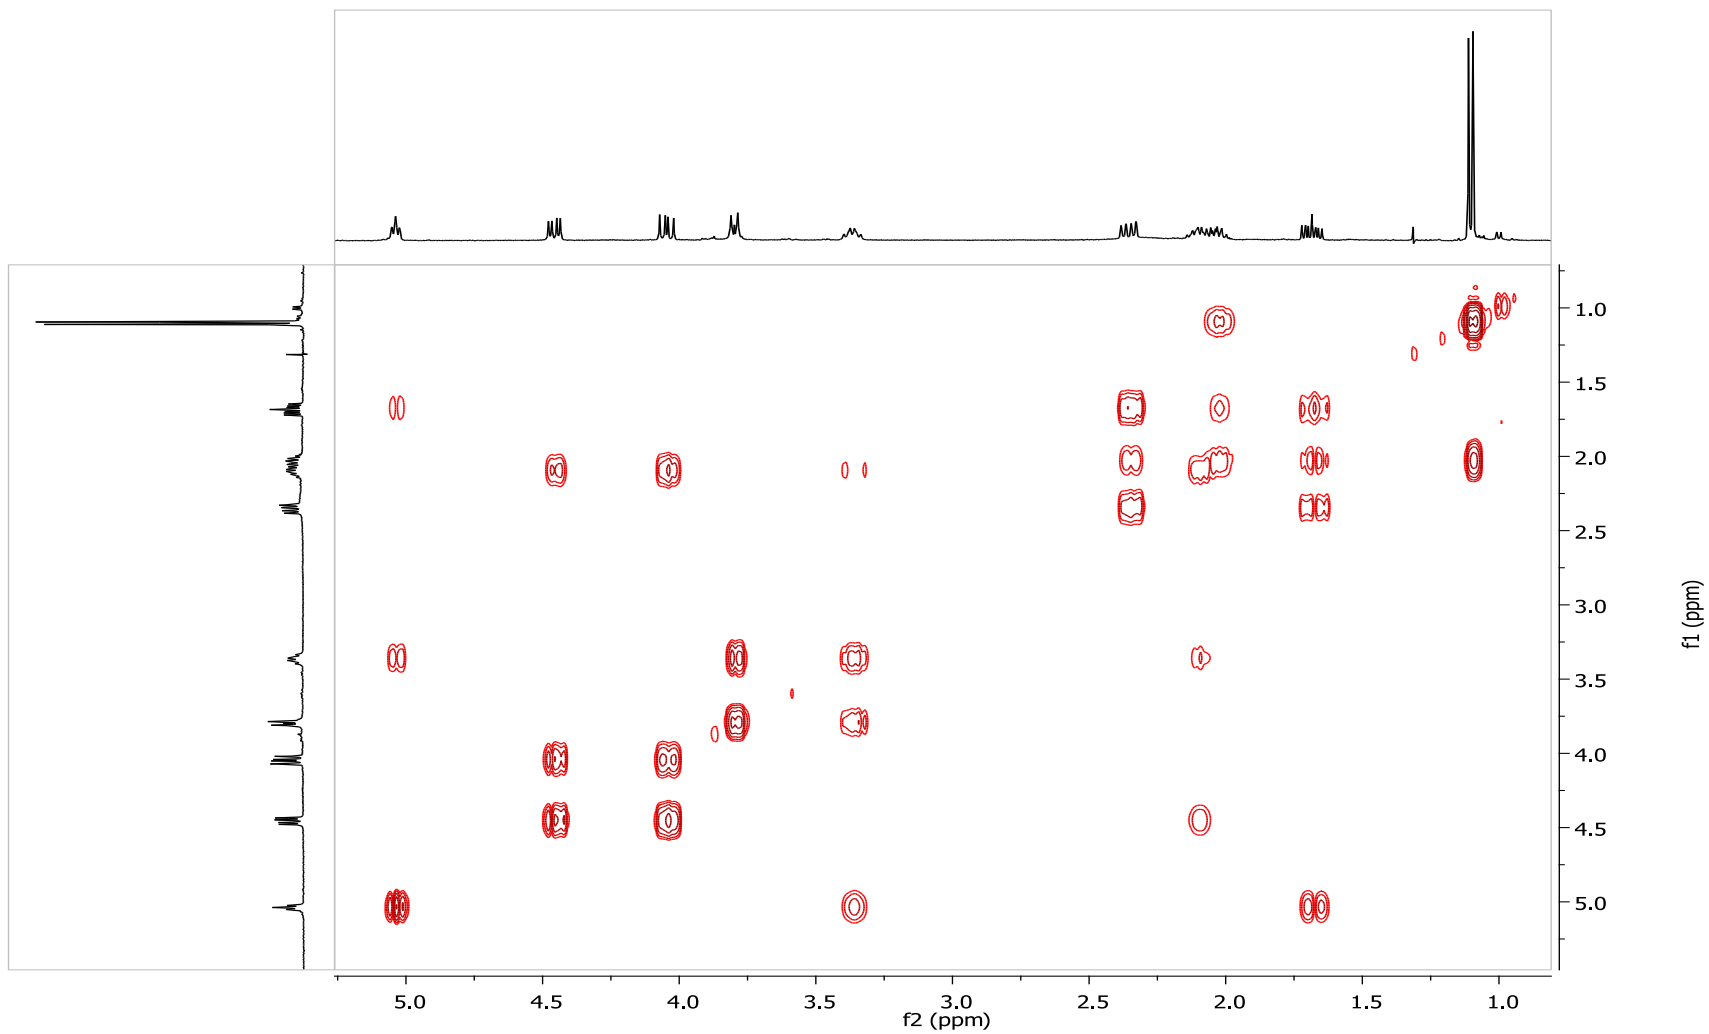

HSQC Spectrum of Cornolactone B (3) (CDCl<sub>3</sub>, 400 MHz)

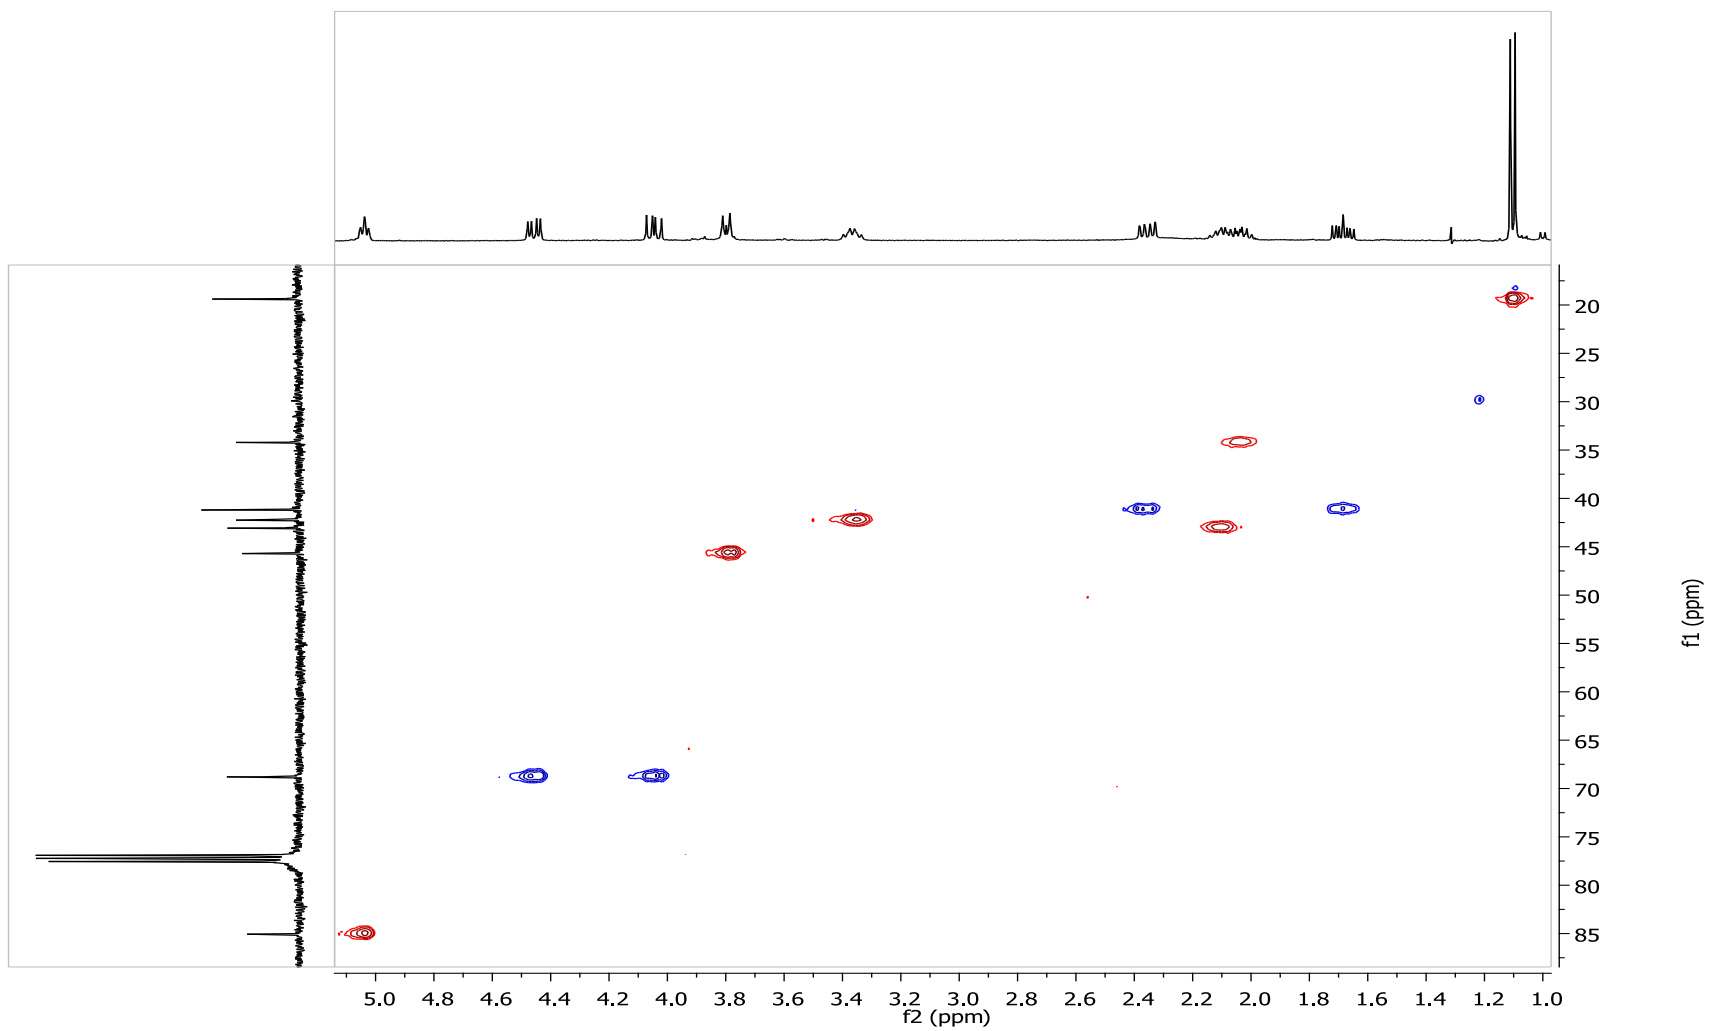

HMBC Spectrum of Cornolactone B (3) (CDCl<sub>3</sub>, 400 MHz)

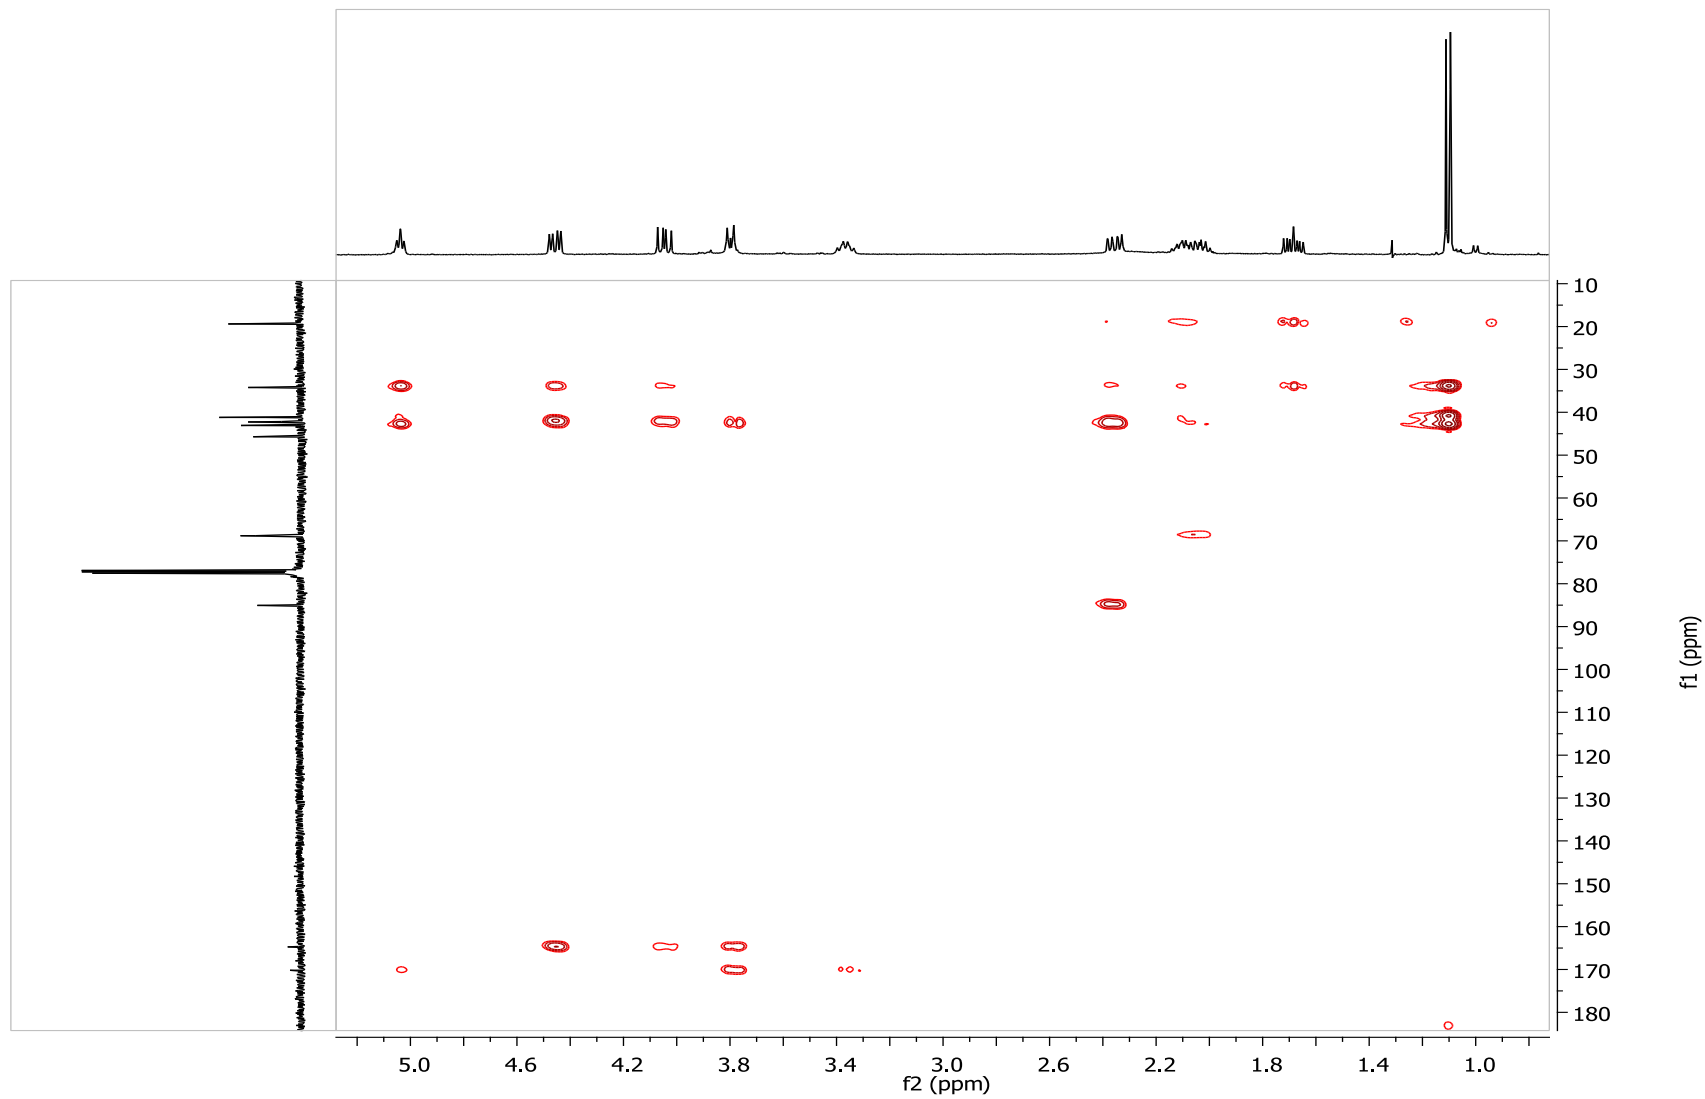

NOESY Spectrum of Cornolactone B (3) (CDCl<sub>3</sub>, 400 MHz)

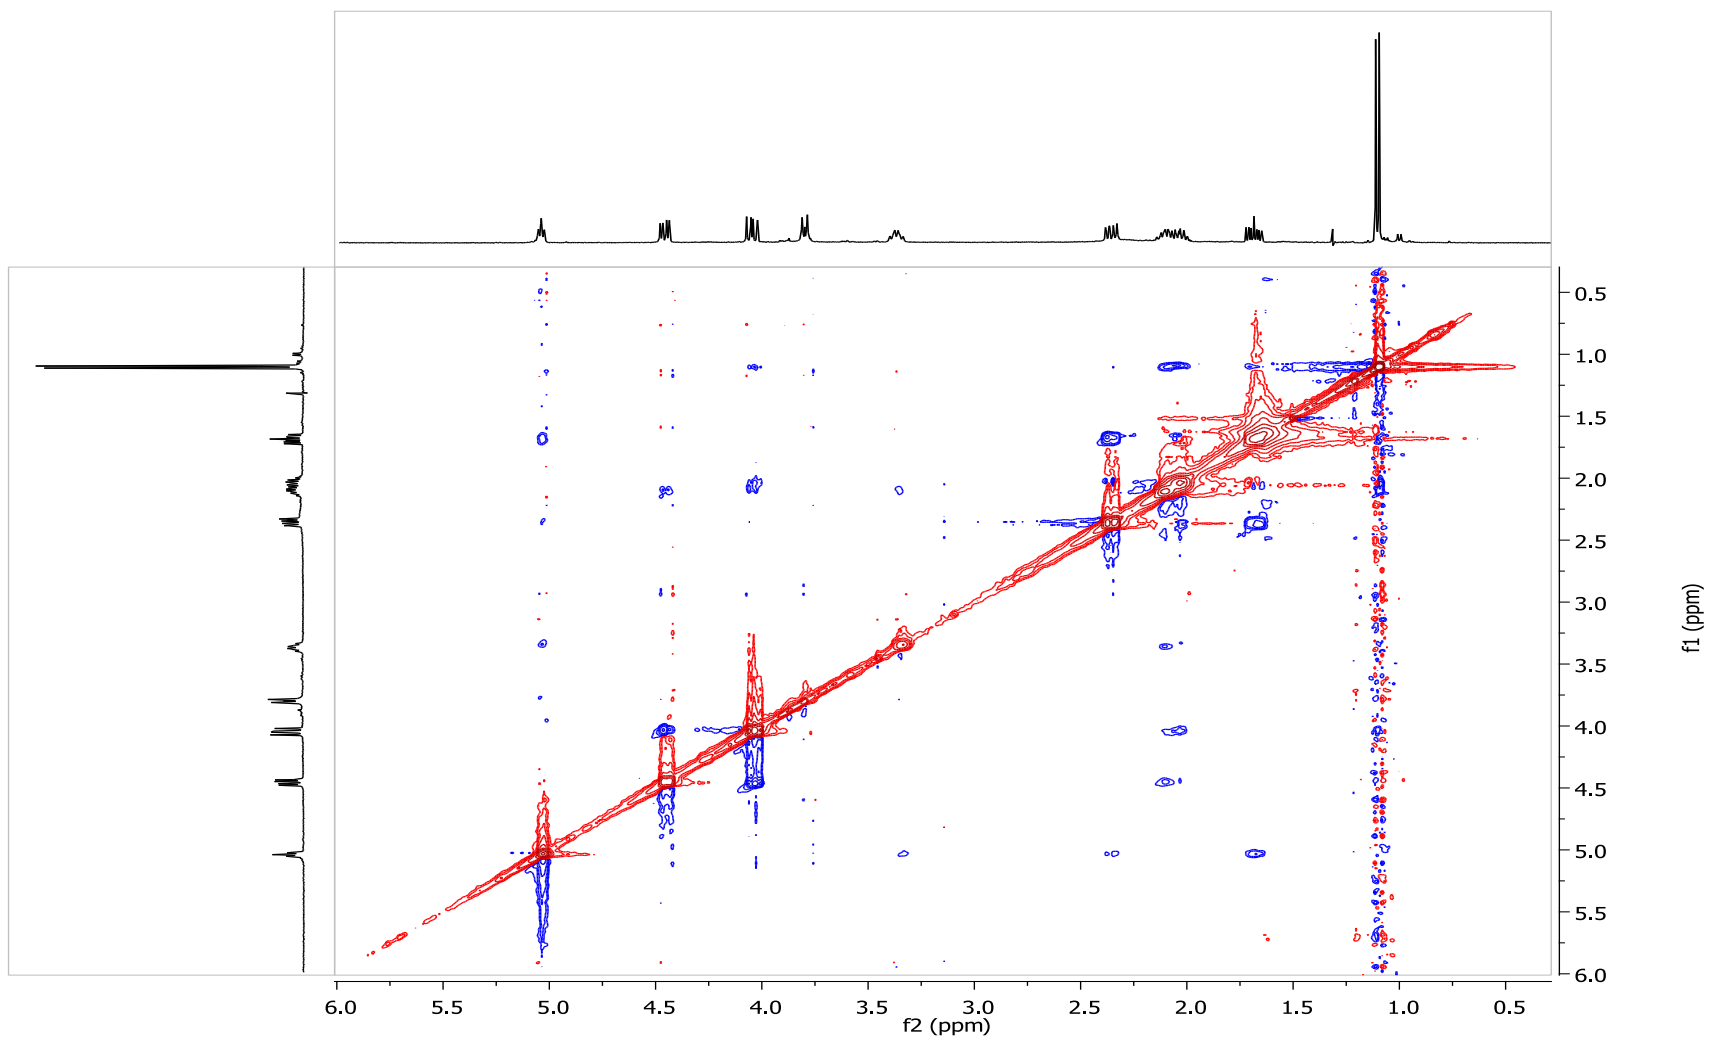

$^1\text{H}$  NMR Spectrum of Cornolactone C (4) ( $\text{CDCl}_3$ , 400 MHz)

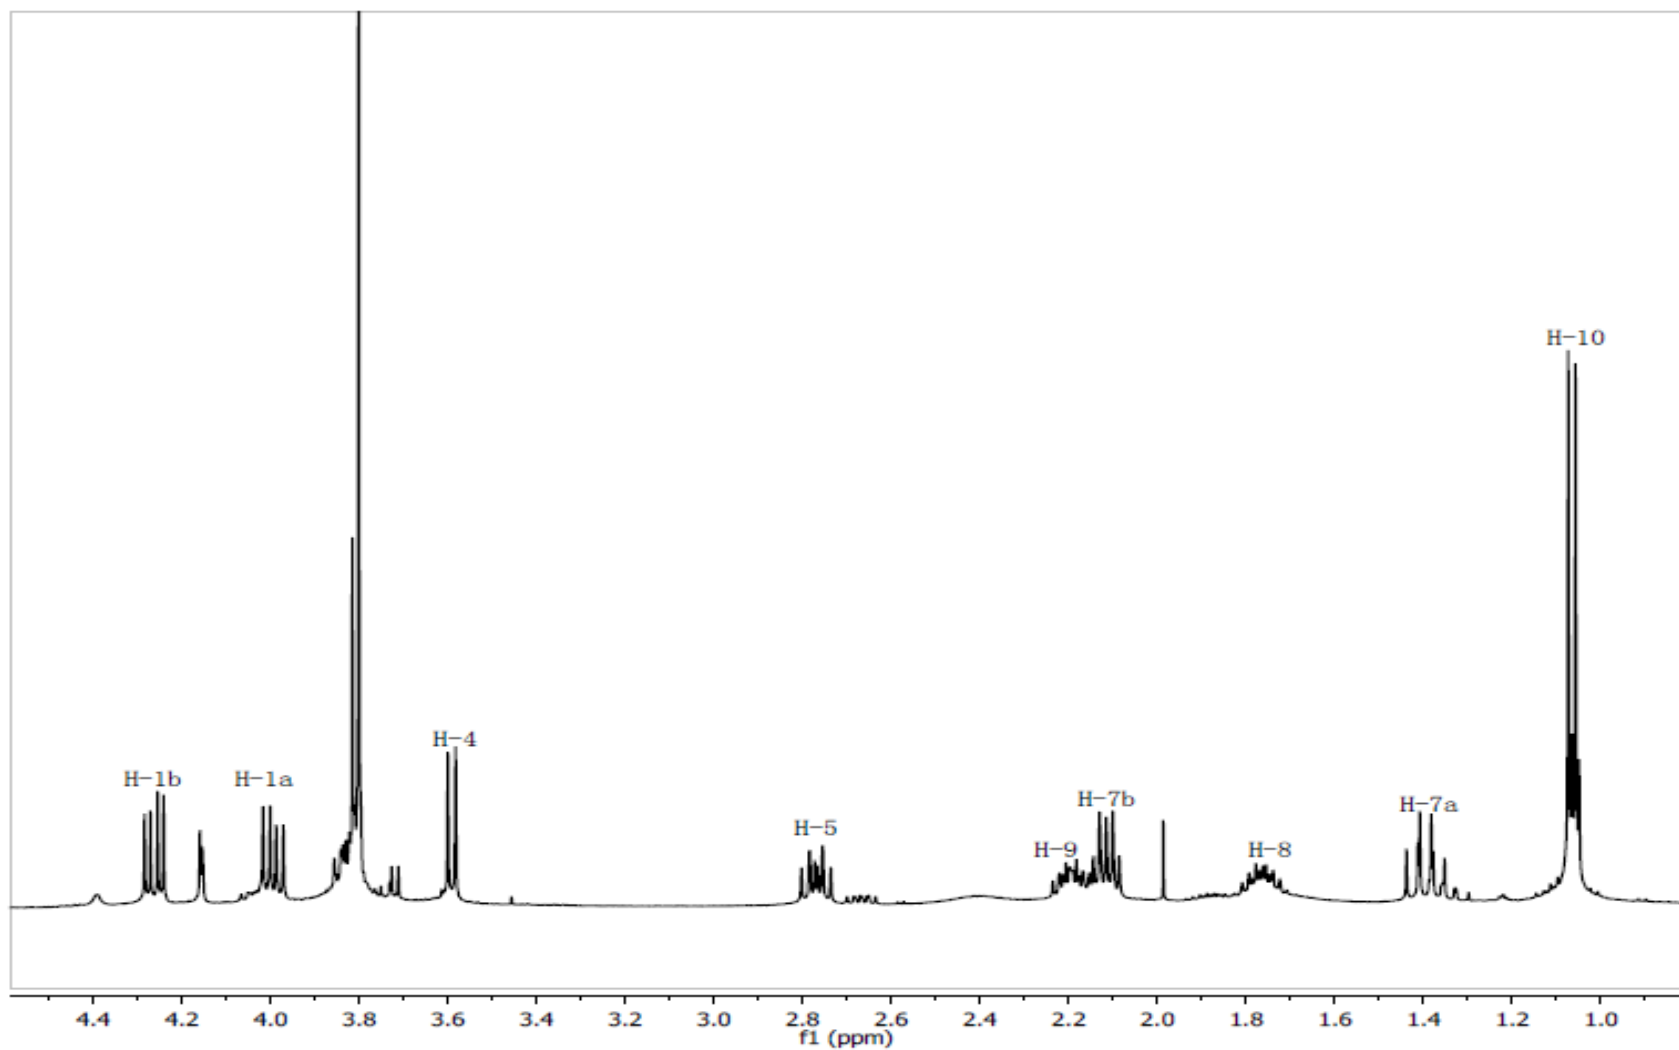

$^{13}\text{C}$  NMR Spectrum of Cornolactone C (4) ( $\text{CDCl}_3$ , 400 MHz)

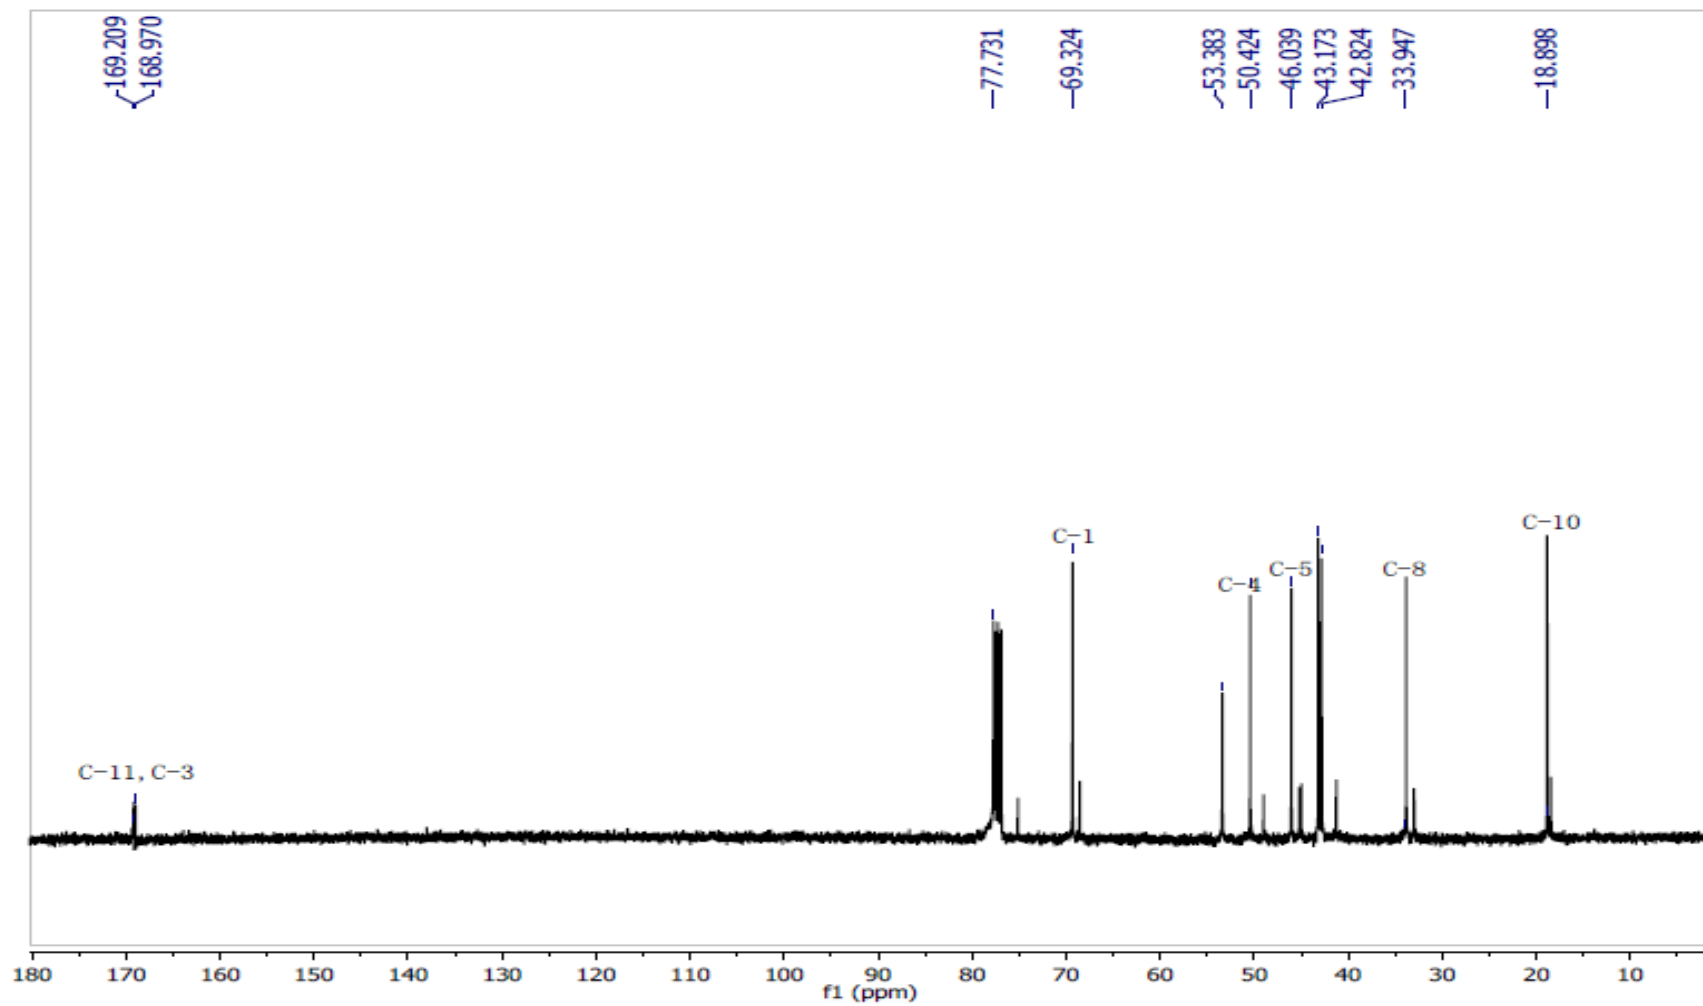



$^1\text{H}$ - $^1\text{H}$  COSY Spectrum of Cornolactone C (4) ( $\text{CDCl}_3$ , 400 MHz)

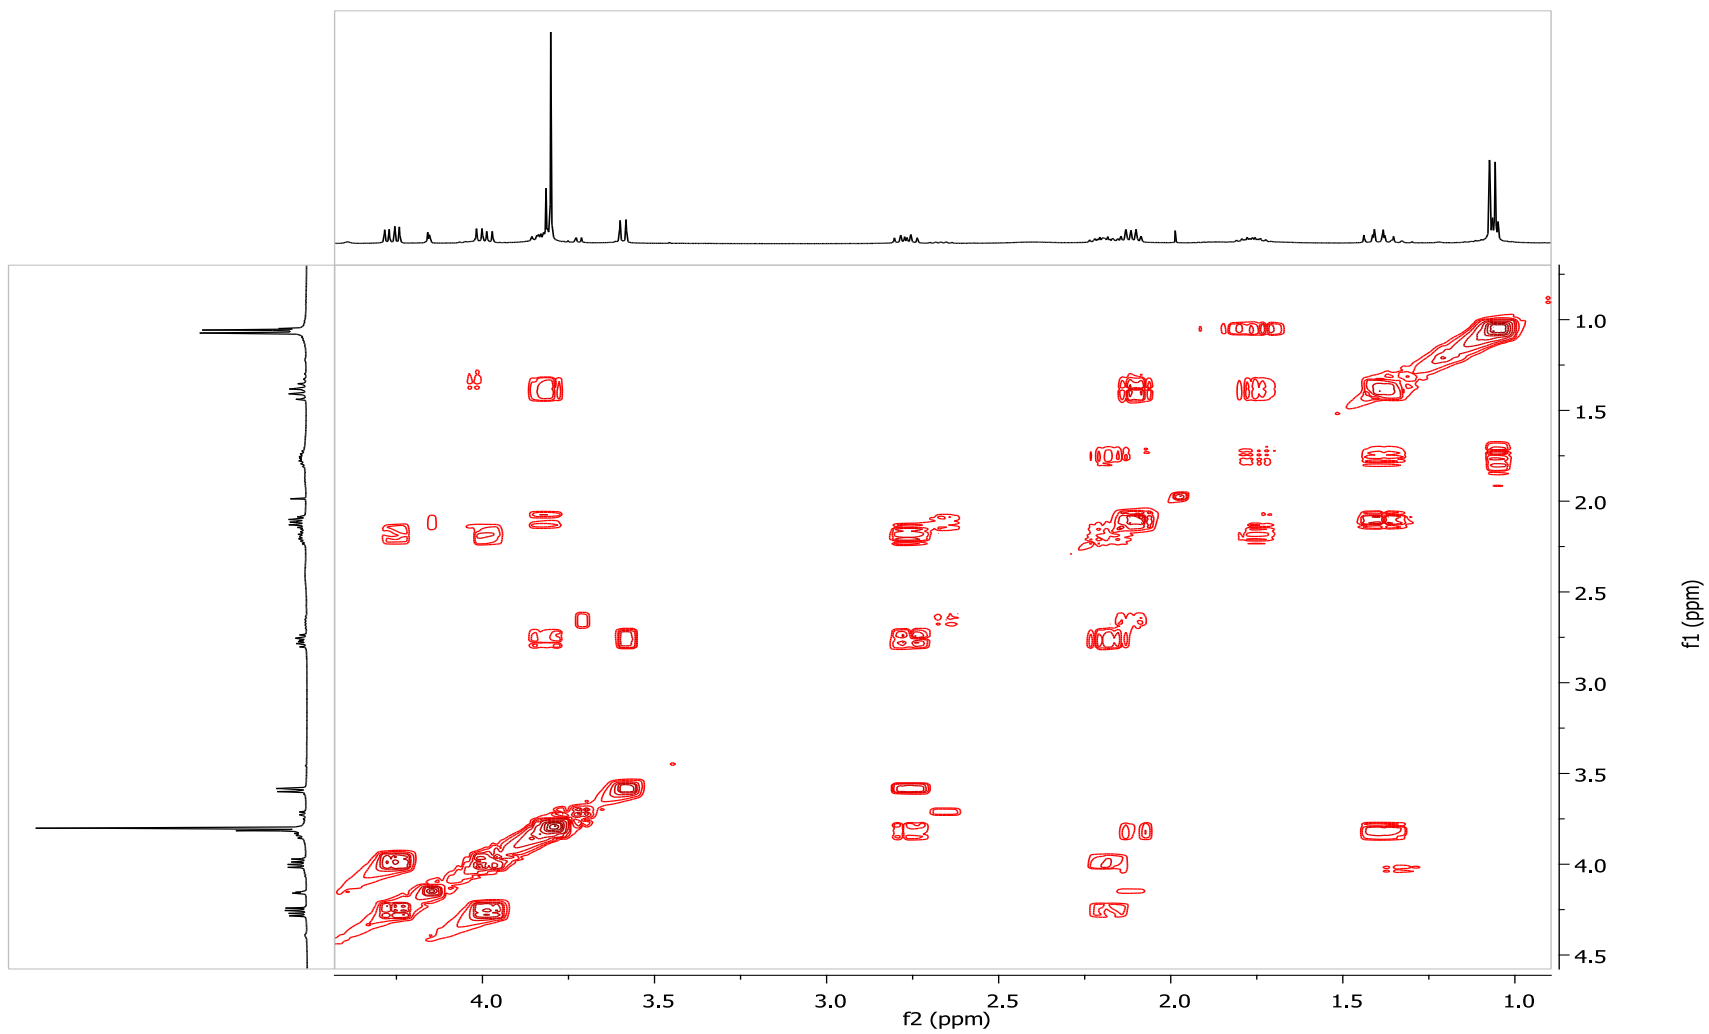

HSQC Spectrum of Cornolactone C (4) (CDCl<sub>3</sub>, 400 MHz)

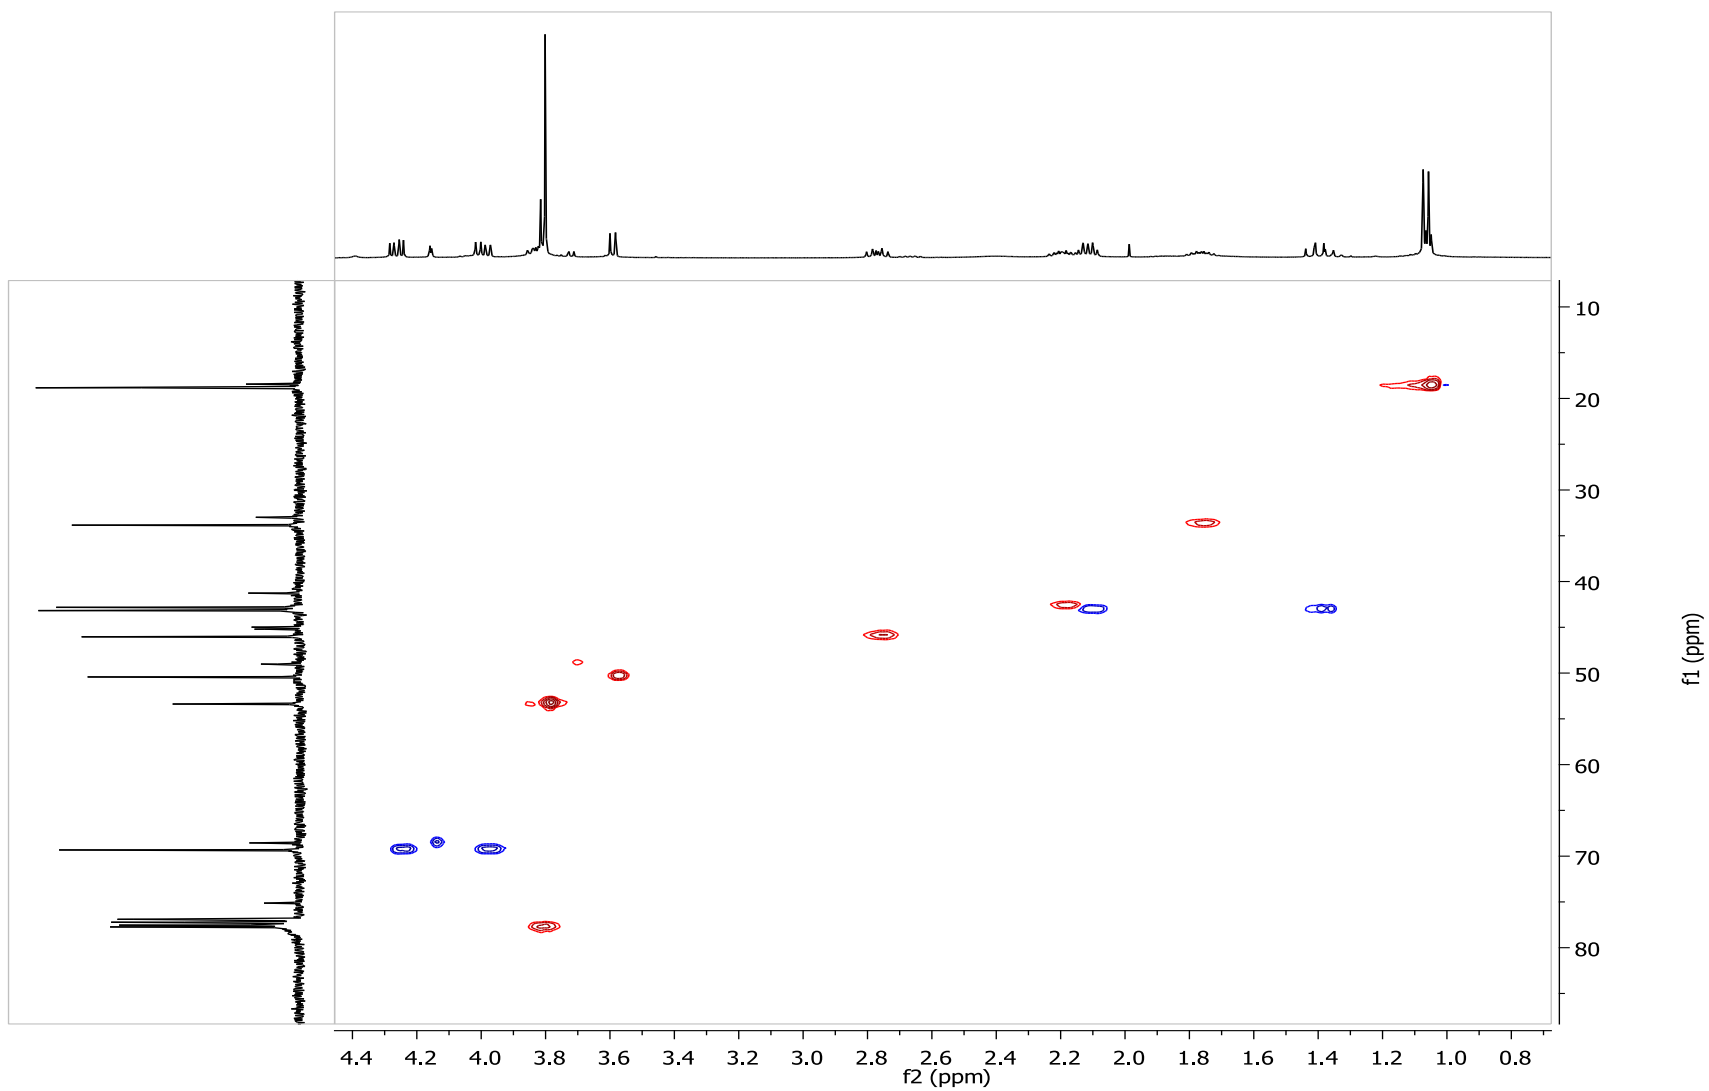

HMBC Spectrum of Cornolactone C (4) (CDCl<sub>3</sub>, 400 MHz)

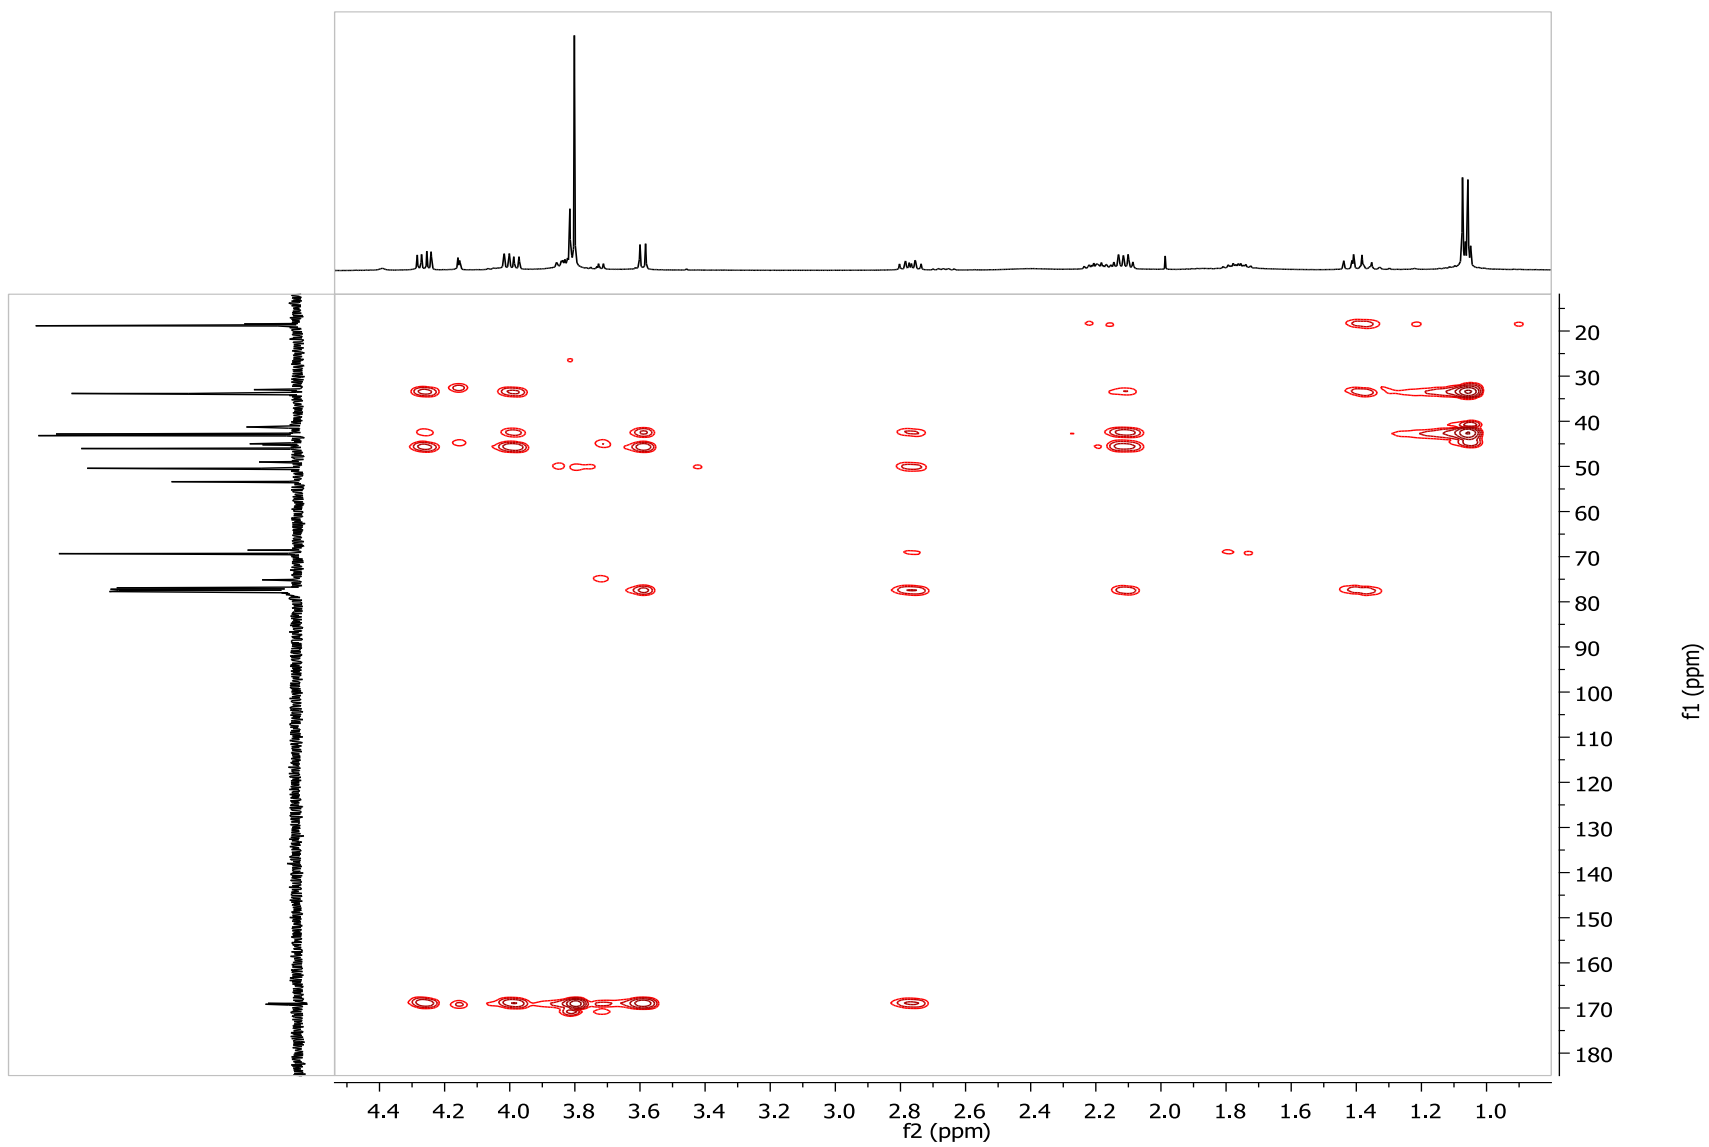

NOESY spectrum of cornolactone C (4) (CDCl<sub>3</sub>, 400 MHz)

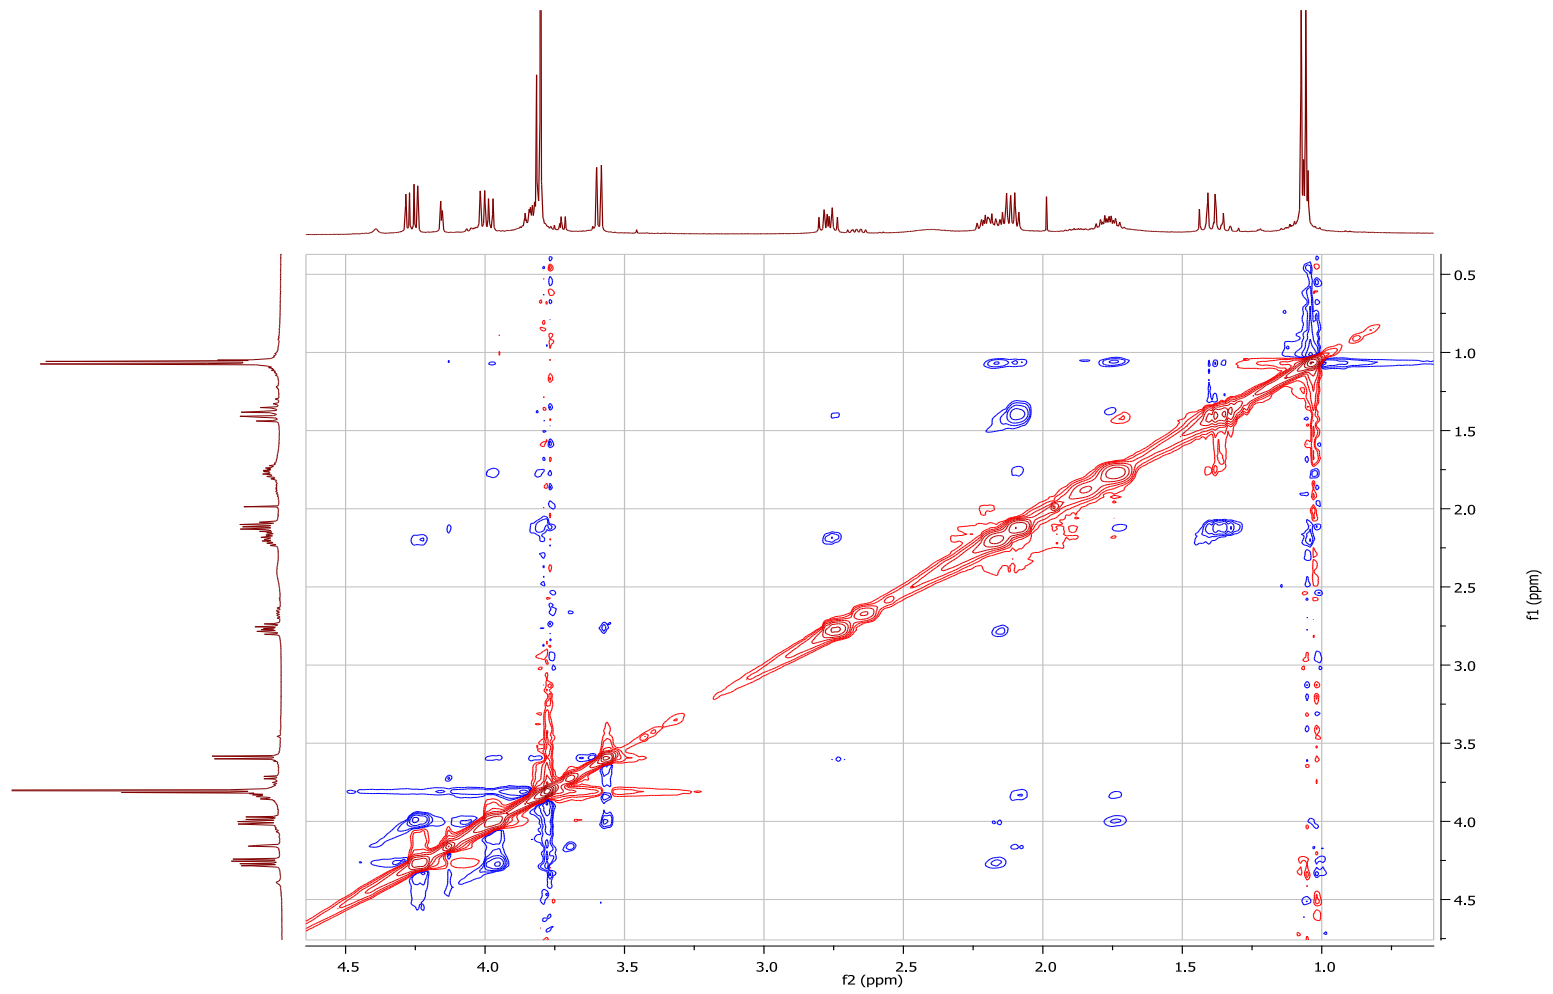

$^1\text{H}$  NMR Spectrum of Cornolactone D (**5**) ( $\text{CDCl}_3$ , 400 MHz)

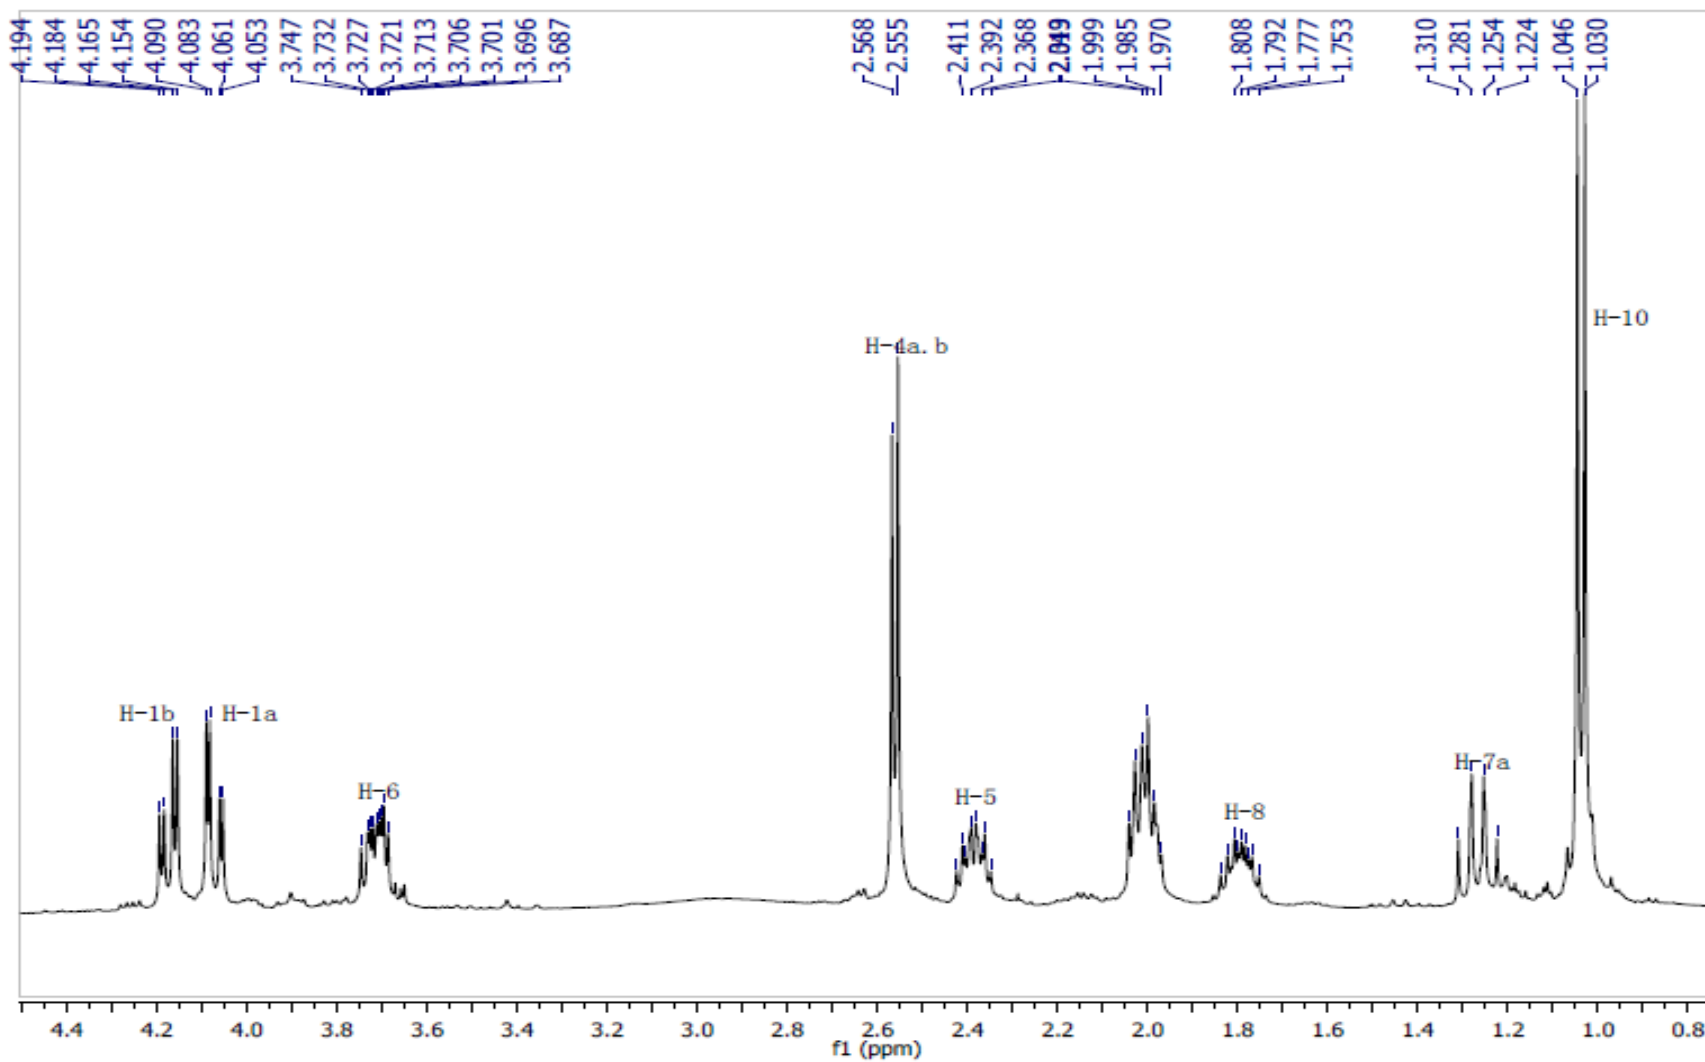

$^{13}\text{C}$  NMR Spectrum of Cornolactone D (**5**) ( $\text{CDCl}_3$ , 100 MHz)

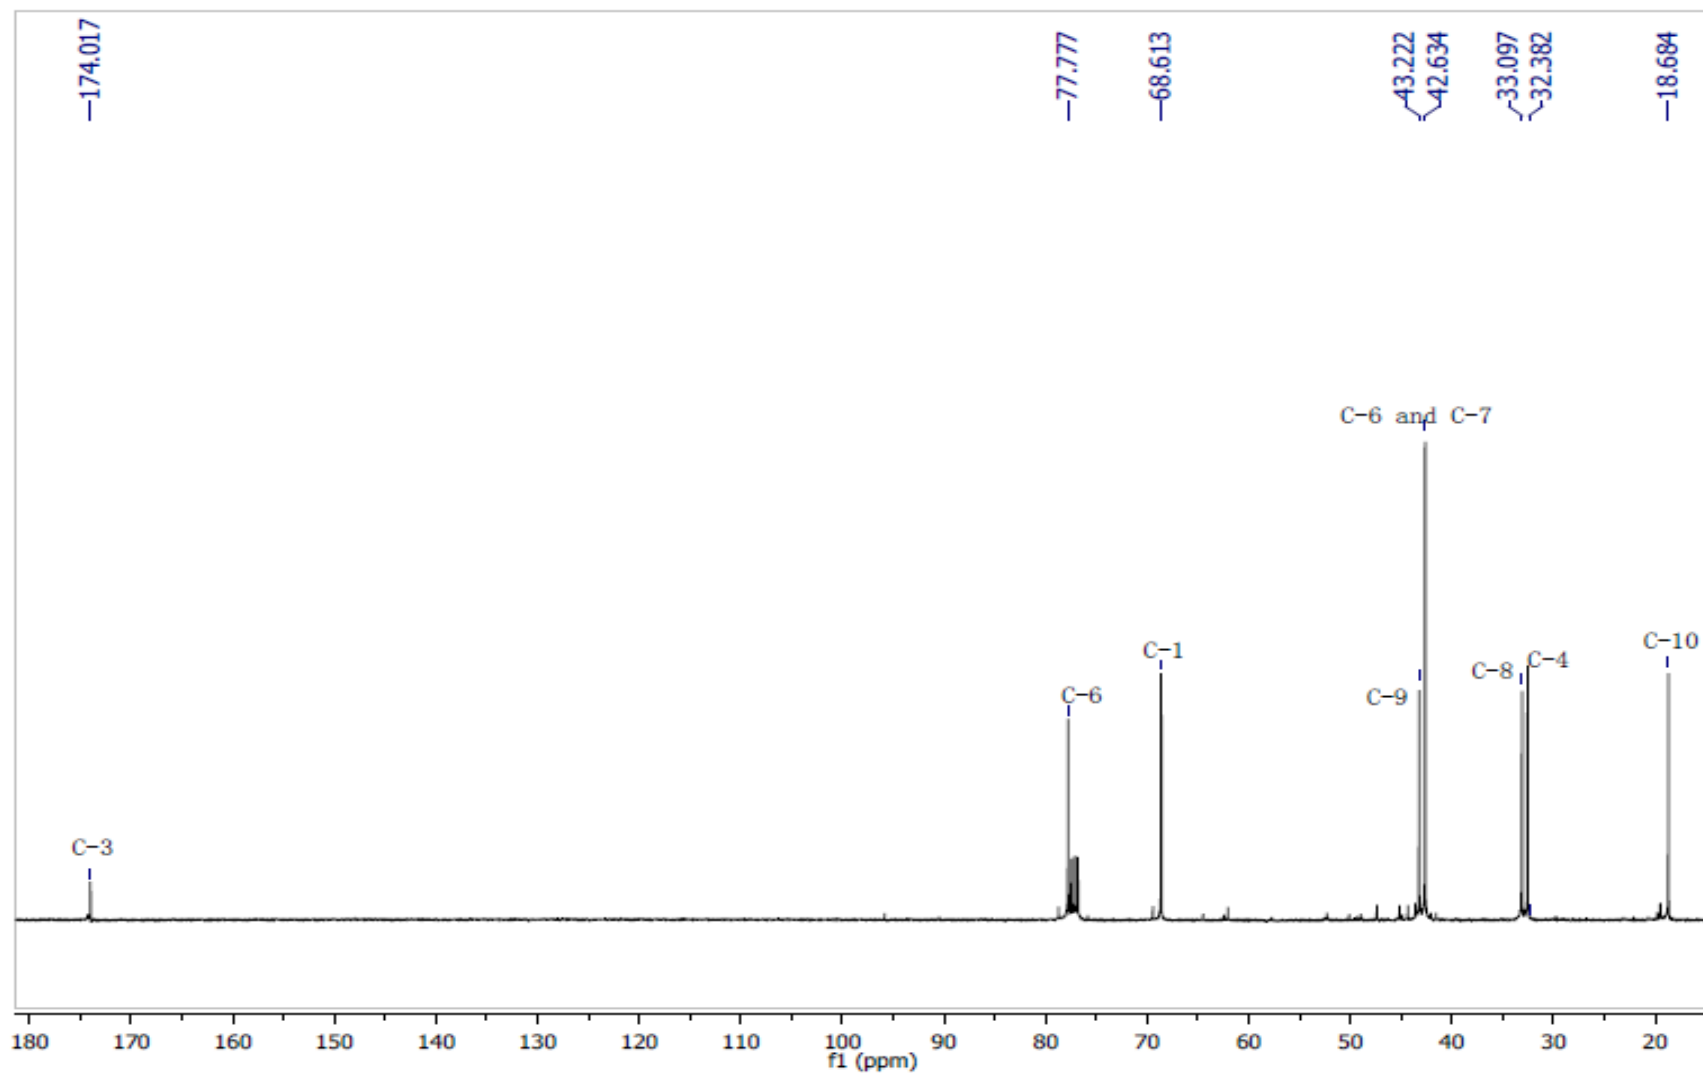

$^1\text{H}$ - $^1\text{H}$  COSY Spectrum of Cornolactone D (**5**) ( $\text{CDCl}_3$ , 400 MHz)

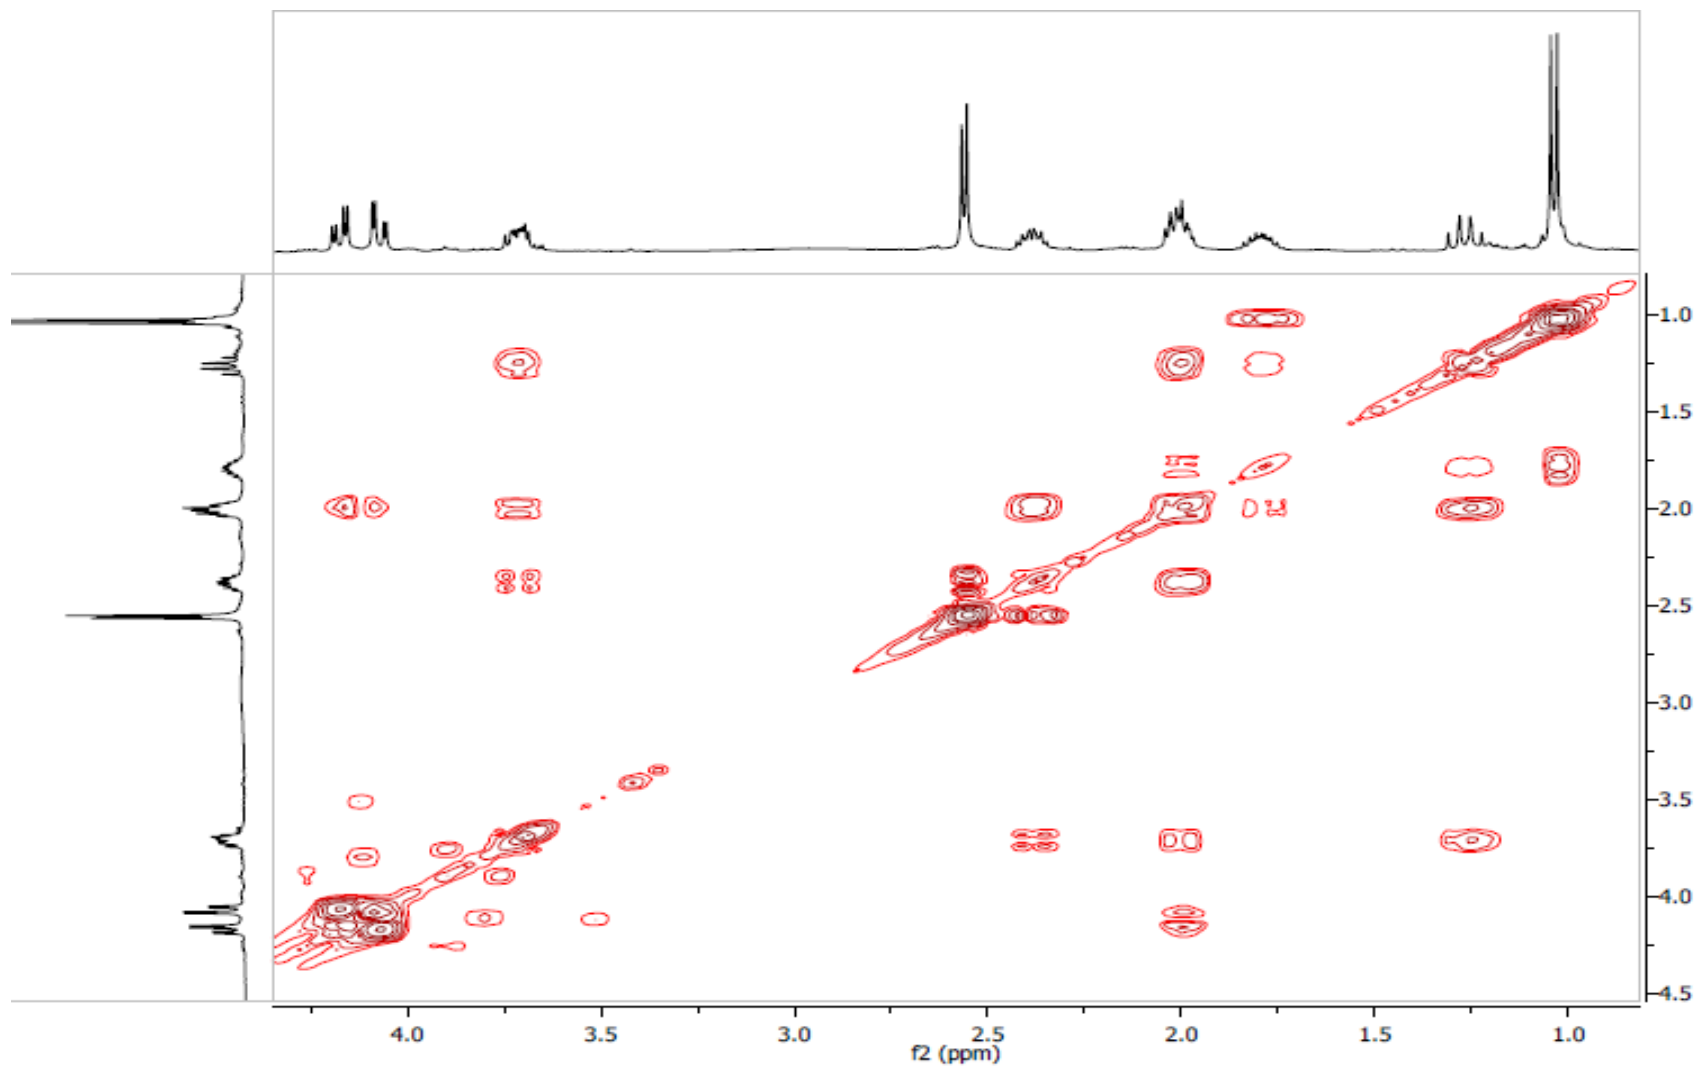

HSQC Spectrum of Cornolactone D (5) (CDCl<sub>3</sub>, 400 MHz)

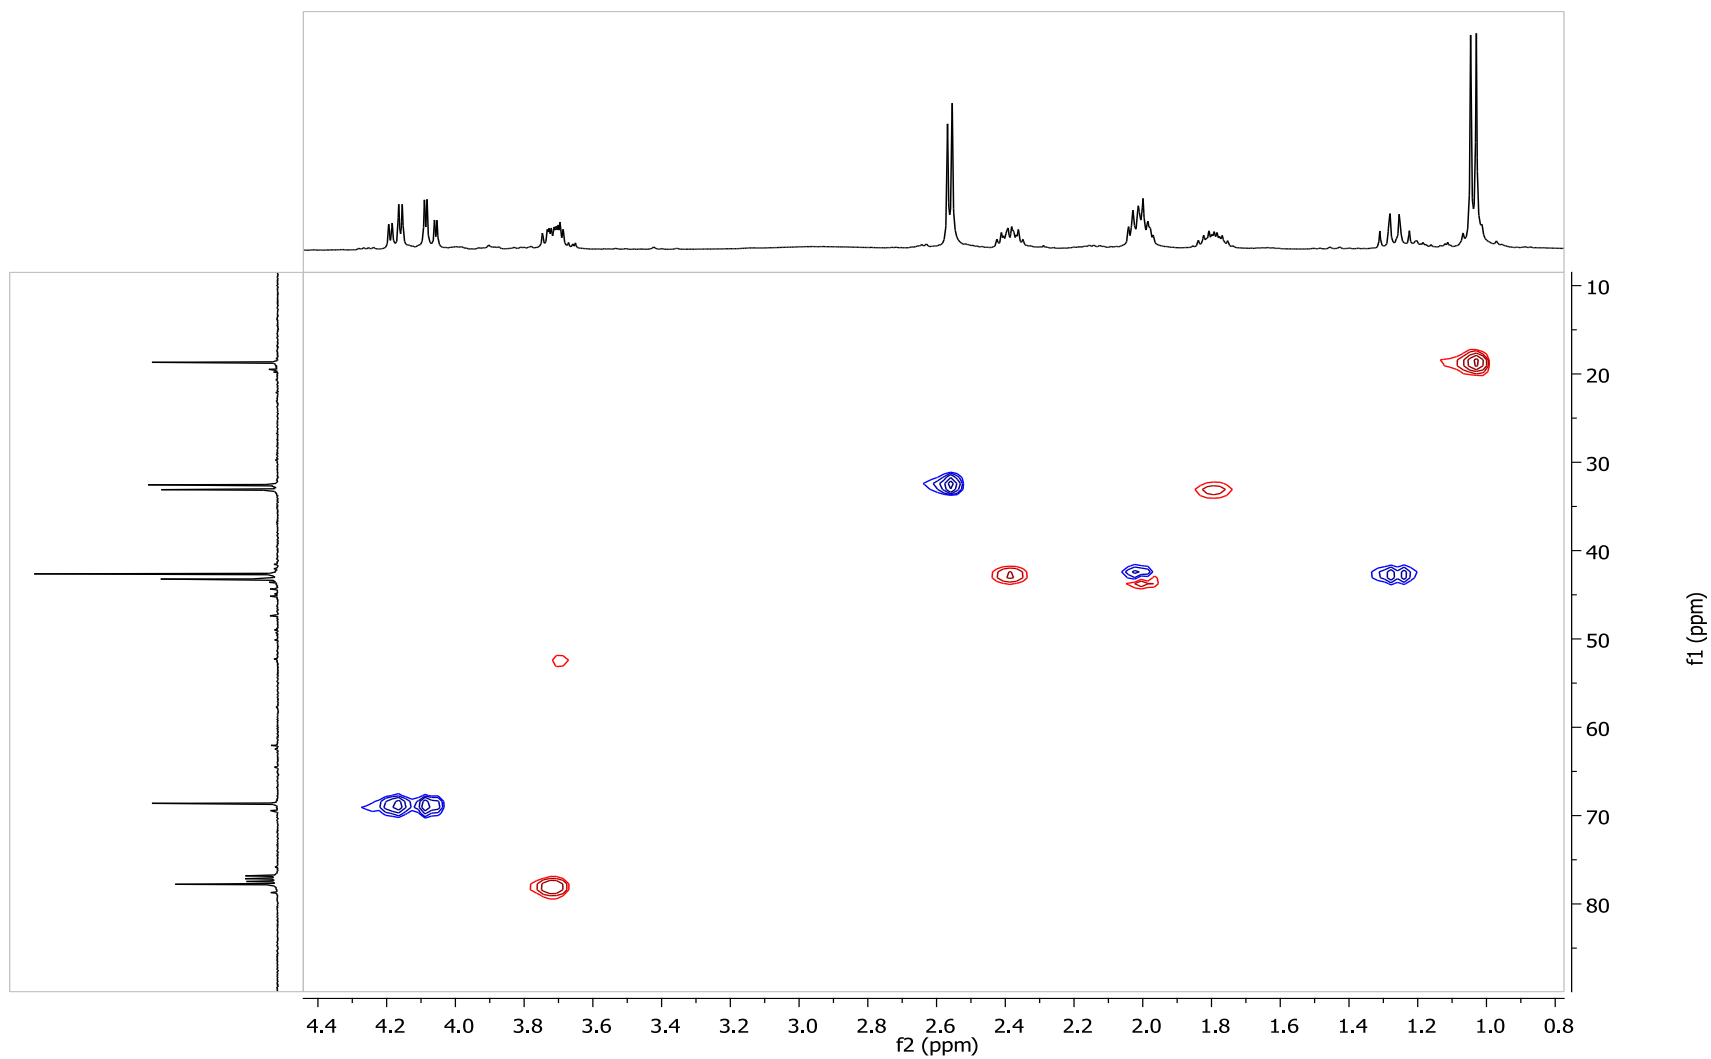



HMBC Spectrum of Cornolactone D (**5**) ( $\text{CDCl}_3$ , 400 MHz)

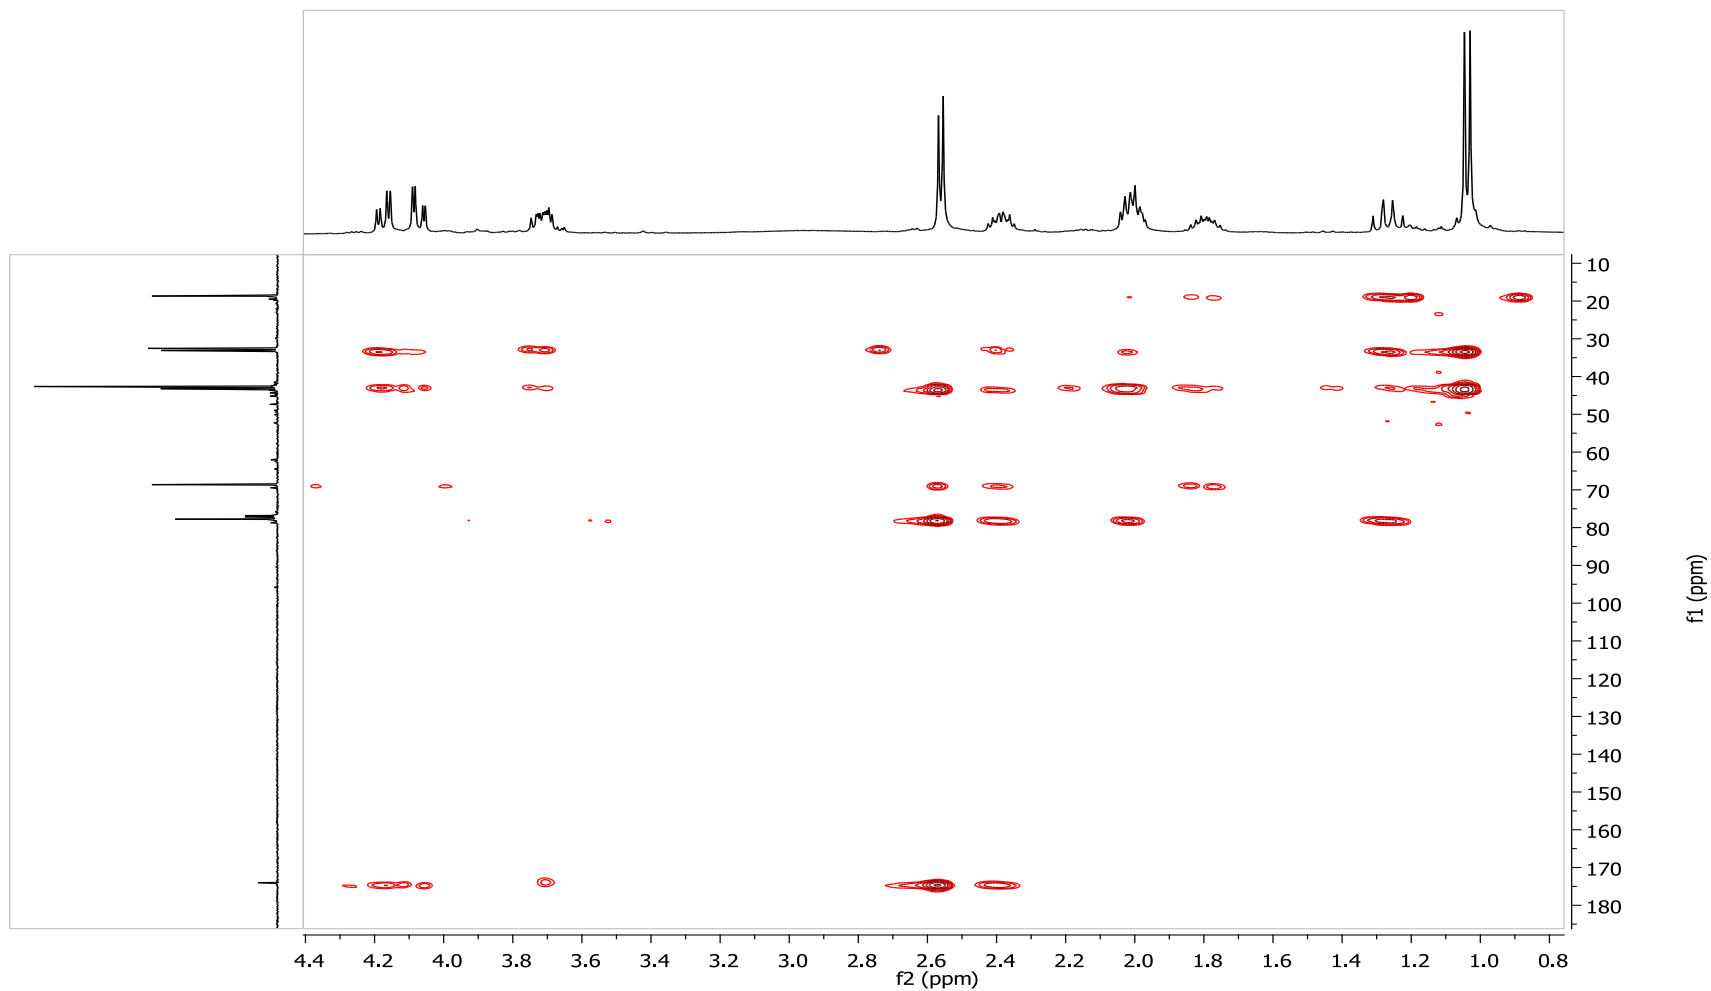

NOESY Spectrum of Cornolactone D (5) (CDCl<sub>3</sub>, 400 MHz)

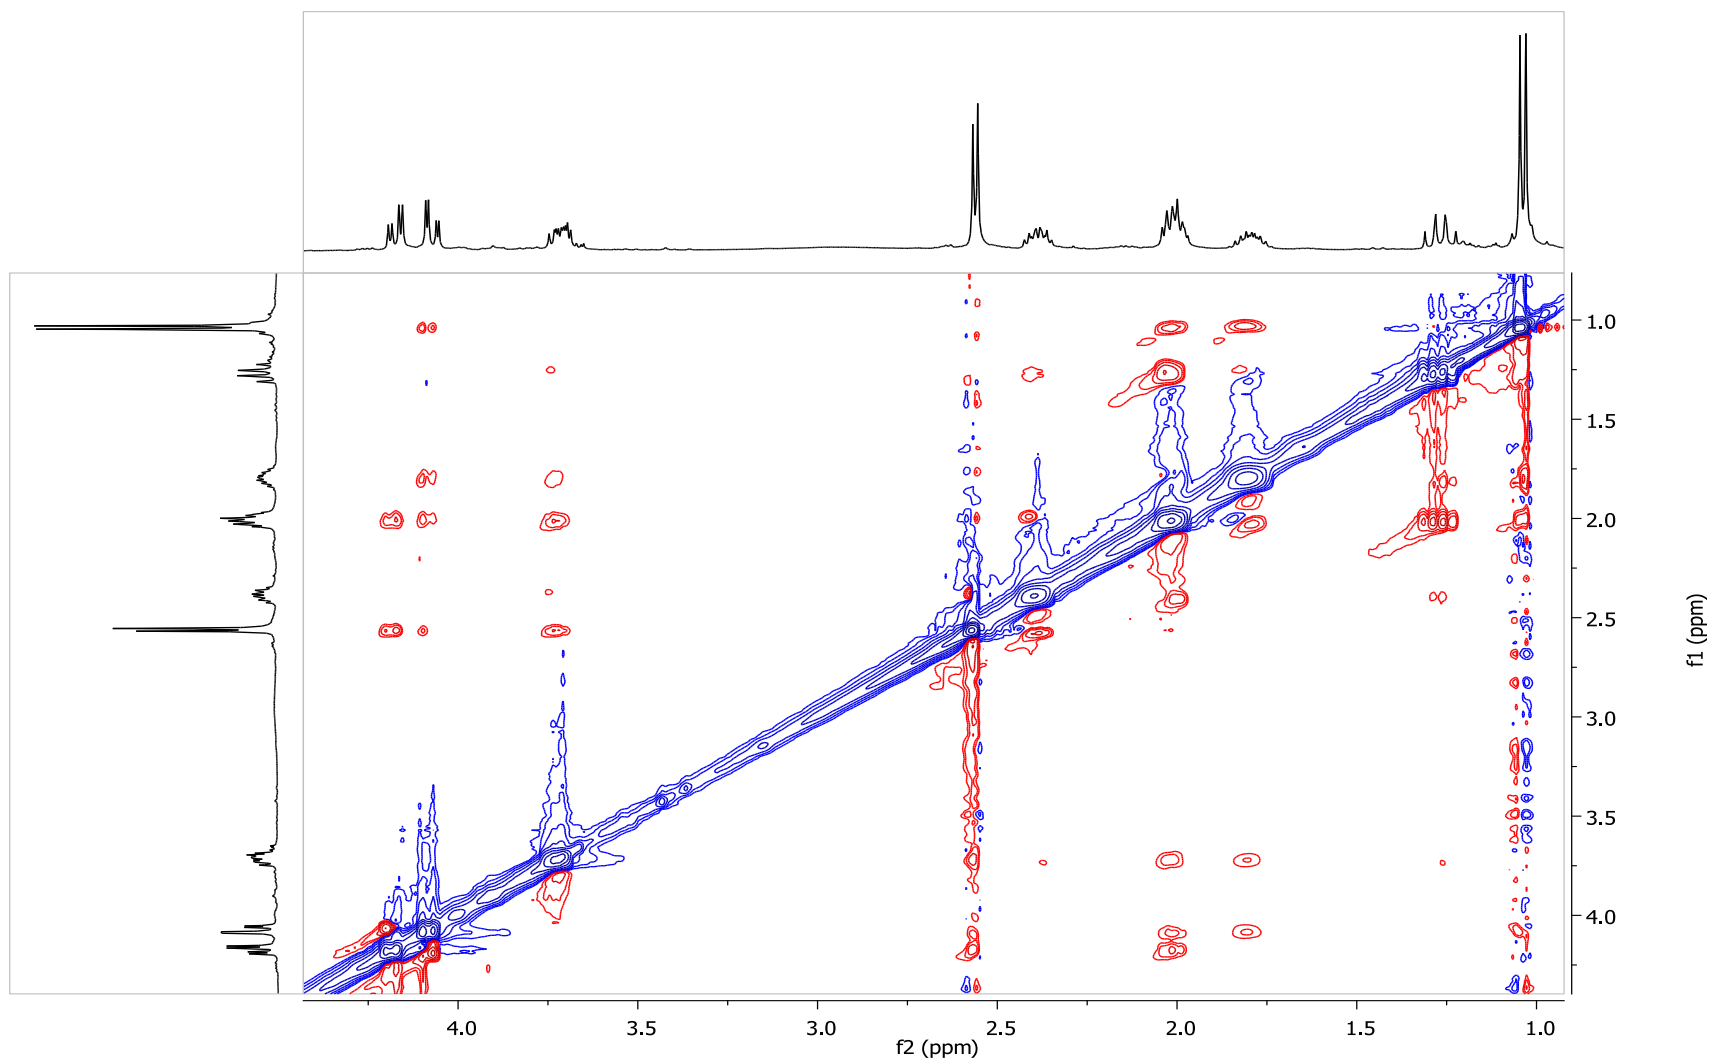

Supplement: np5002362_si_001.pdf [file np5002362_si_001.pdf]
